# Supplementary material for: Genome-culture coevolution promotes rapid divergence of killer whale ecotypes
Source: PubMed Central journal article supplement (PMC4895049; doi:10.1038/ncomms11693), 2016-05-31
Supplement: ncomms11693-s1.pdf [file ncomms11693-s1.pdf]

# Supplementary Figures

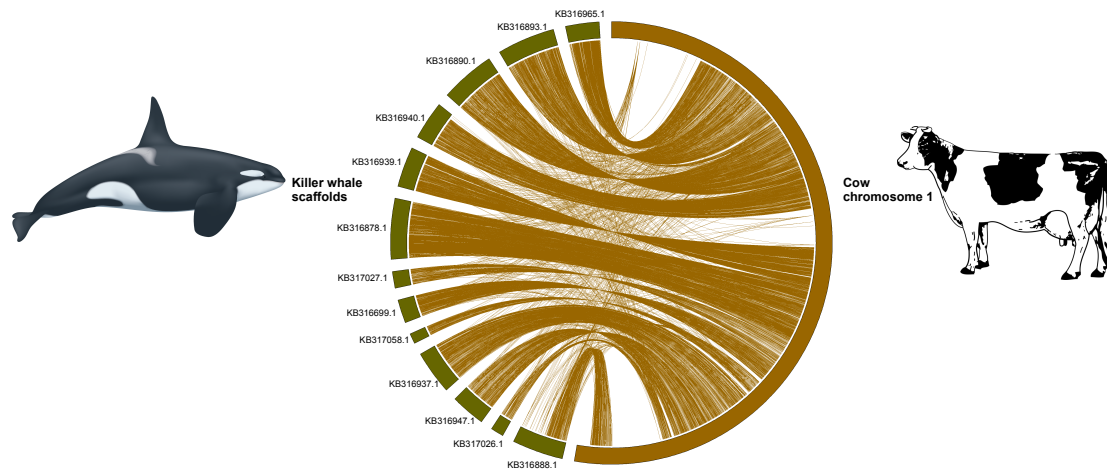

**Supplementary Figure 1.** Circos plot of chromosome 1 of the cow genome (brown) and corresponding scaffolds in the killer whale genome (dark green). For illustrative purposes (e.g. Manhattan plots) a synteny based chromosomal assembly of the reference genome was produced by aligning the killer whale scaffolds to a chromosomal assembly of the cow *Bos taurus* (Btau\_4.6.1) genome using the *Satsuma* aligner<sup>70</sup> with default settings. Synteny was conserved and showed no large-scale inter- nor intra-chromosomal rearrangements in any scaffolds. Inferences based on outlier peaks were not influenced by this super- scaffolding process.

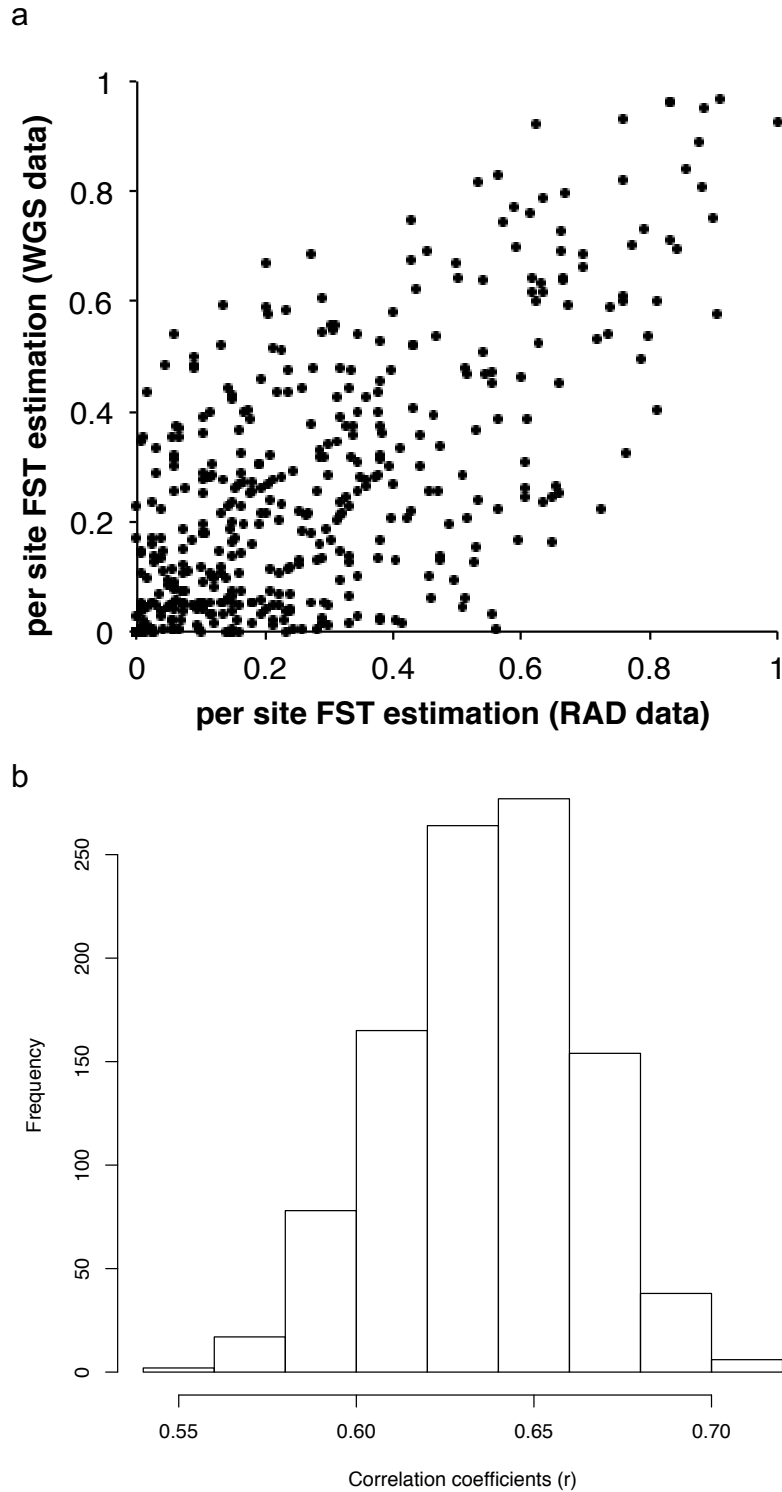

**Supplementary Figure 2.** Correlation of per-site  $F_{ST}$  between low-coverage whole genome sequencing (WGS) data generated for this study and high coverage ( $>20\times$ ) published RAD-seq data. **a**, Per-site  $F_{ST}$  estimates from a pairwise comparison of WGS data of 10 *residents* and 10 *transients* plotted against  $F_{ST}$  estimates of the same 547 polymorphic sites from a pairwise comparison from RAD data of 52 *residents* and 37 *transients*<sup>19</sup>. **b**, Distribution of the correlation coefficients ( $r$ ) of the per-site  $F_{ST}$  estimates from a pairwise comparison of WGS data of 10 *residents* and 10 *transients* with 1,000 random re-samplings with replacement of 10 *residents* and 10 *transients* from the RAD-seq dataset<sup>19</sup>.

**a**

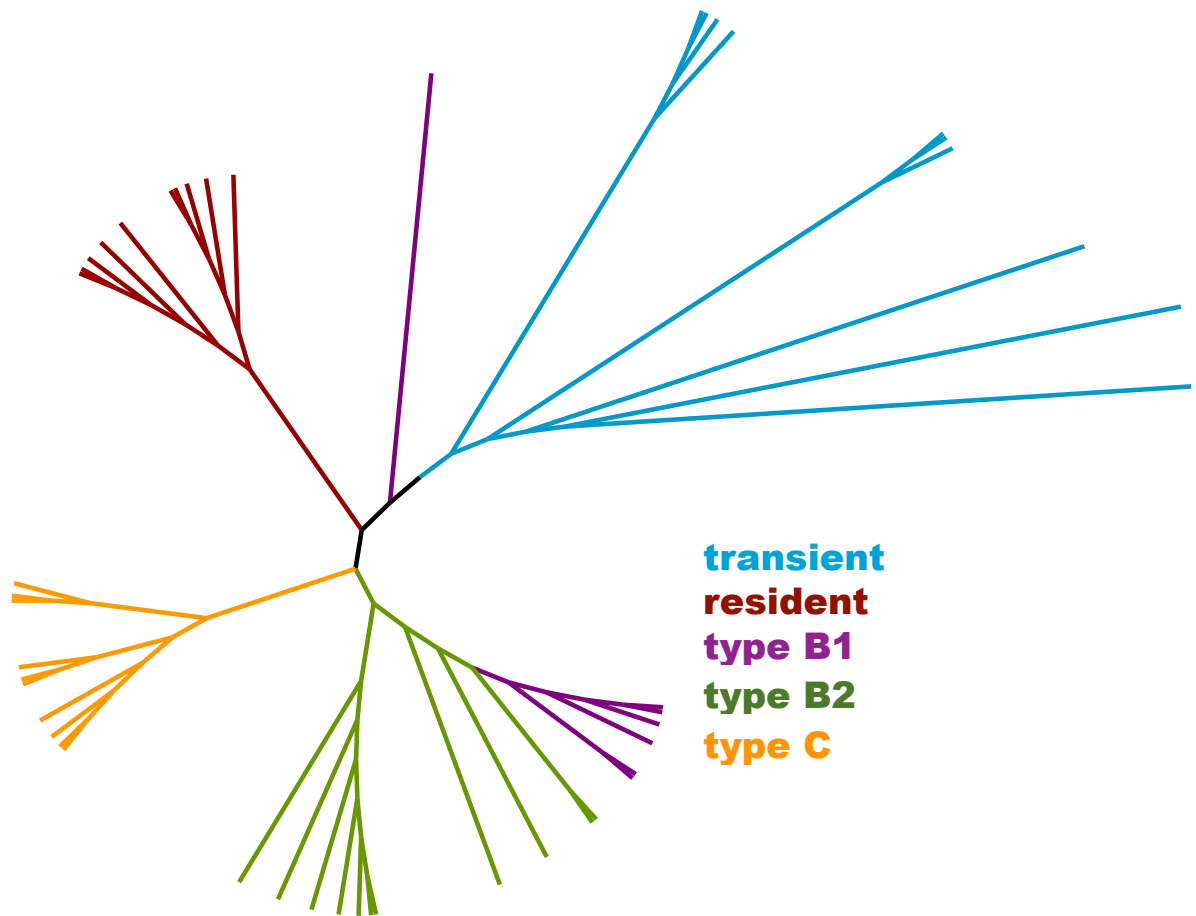

**Supplementary Figure 3a**, Maximum-likelihood phylogenetic tree reconstructed from mitochondrial genome sequences generated as per reference 72. Filtered reads were further mapped to a reference mitochondrial genome (GU187176.1) and compared with previously published mitogenome sequences from these individuals<sup>11</sup>. The assembled mitogenome sequences were a 100% match with those previously generated for these individuals using targeted sequencing approaches<sup>11</sup>. As previously reported, the mitogenomes of each ecotype clustered in strongly supported mitochondrial DNA clades, with the exception that one *type B1* individual sampled at a different geographic location to the other *type B1* individuals, had a highly divergent mitogenome haplotype<sup>11</sup>.

**b**

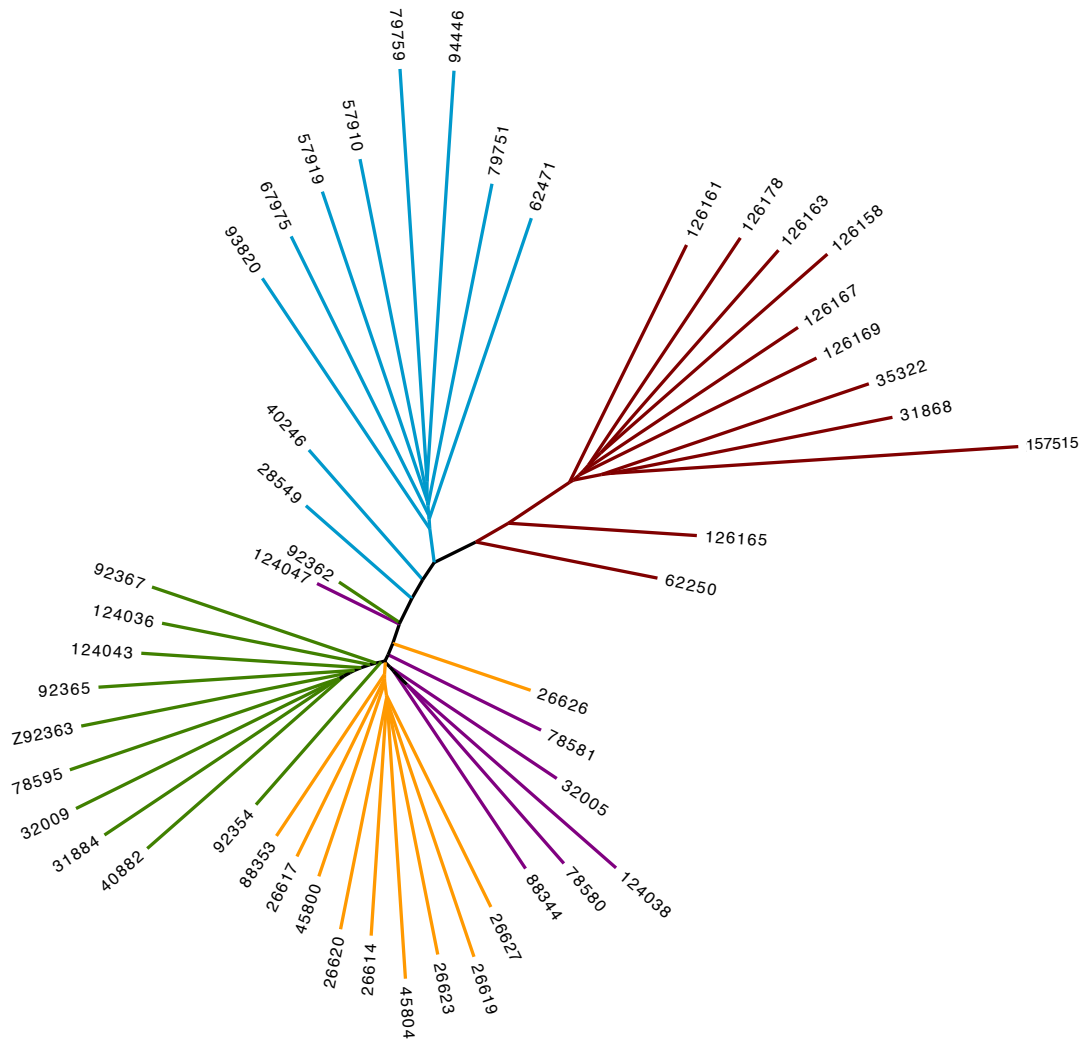

**Supplementary Figure 3b**, Distance-based tree generated from the 48 low coverage and one high ( $\sim 20\times$ ) coverage nuclear genome sequences. We generated 100 matrices of pairwise genetic distances, in which pairwise genetics distances were calculated using ngsDist<sup>72</sup>, which takes genotype uncertainty into account by avoiding genotype calling and instead using genotype posterior probabilities estimated by ANGSD. A block-bootstrapping procedure was used to generate 100 distance matrices, obtained by repetitively sampling blocks of the original data set (Supplementary Data 3). Pairwise genetic distances were visualised as a phylogenetic tree using the distance-based phylogeny inference program FastME 2.0<sup>73</sup>. Individuals largely clustered by ecotype indicating that segregating alleles are shared among individuals within each ecotype. The short branches that did not cluster as closely to ecotype were the individuals with the least sites covered at  $\geq 2\times$  (see Supplementary Table 1).



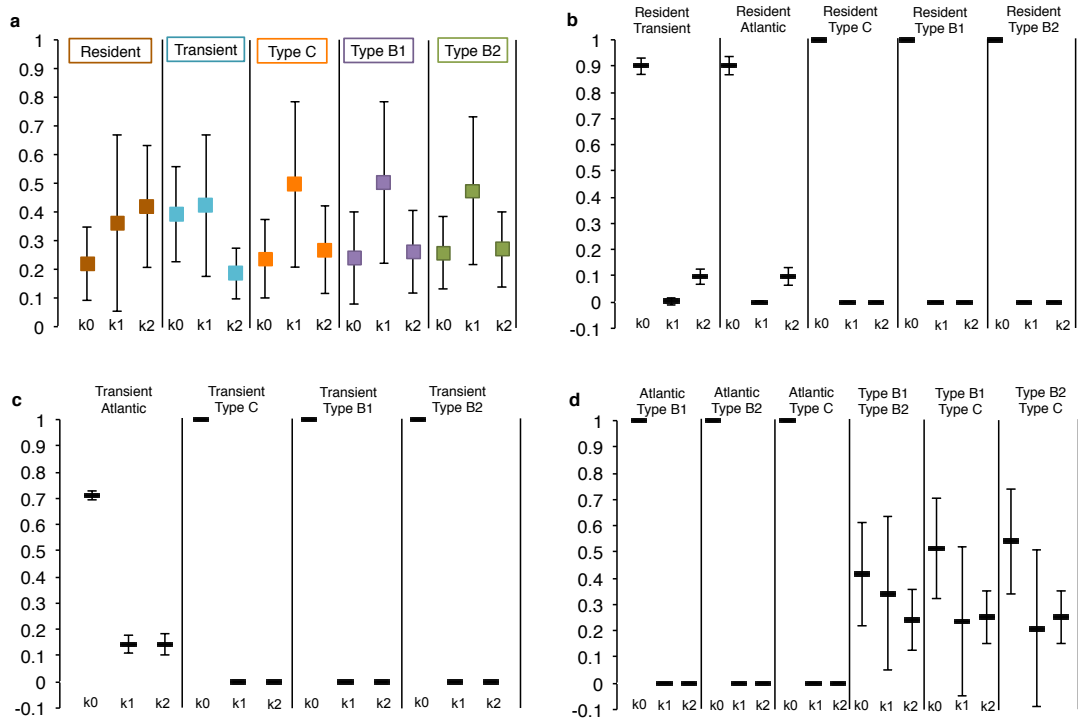

**Supplementary Figure 4.** Maximum likelihood estimates of pairwise relatedness based on genotype likelihoods. We estimated pairwise relatedness due to identity-by-descent (IBD), i.e. genetic identity due to a recent common ancestor, of every possible combination of two individuals using NgsRelate<sup>74</sup>. NgsRelate provides ML estimates of  $R$ , where  $R = (k_0, k_1, k_2)$  and  $k_m$  is the fraction of genome in which the two individuals share  $m$  alleles IBD. NgsRelate provides maximum likelihood estimates of  $R$  by finding the value of  $R$  that maximizes this likelihood function with an Expectation Maximization algorithm using genotype likelihoods instead of genotypes to account for the inherent uncertainty of the genotypes. NgsRelate has been shown using simulations and real data to provide robust estimates for low-depth NGS data (as low as 1-2 $\times$ ), which are markedly better than genotype-based methods<sup>74</sup>. Each plot shows the proportion of the genome for  $k_m$  in which two individuals share  $m$  alleles IBD in pairwise comparisons **a**, among individuals from the same ecotype, **b**, between an individual from the *resident* ecotype and an individual from another ecotype, **c**, between an individual from the *transient* ecotype and an individual from another ecotype, **d**, among individuals from the different Antarctic ecotypes, and a North Atlantic individual. The full results are reported in Supplementary Data 4.

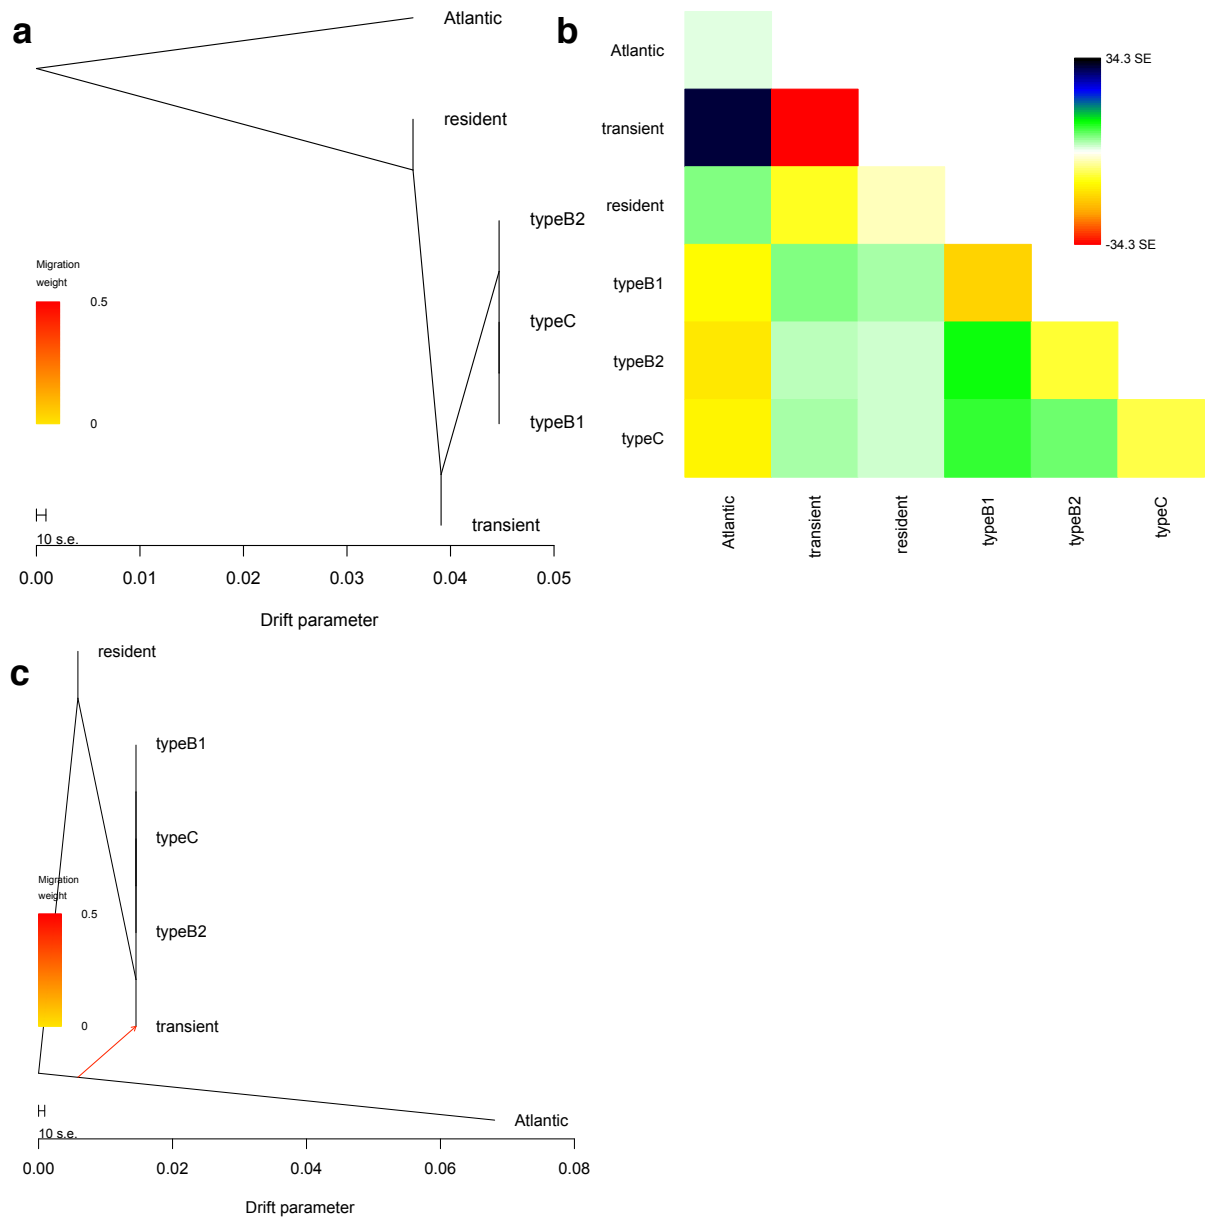

**Supplementary Figure 5. a**, Maximum-likelihood graph from TreeMix. The scale bar shows ten times the average standard error of the entries in the sample covariance matrix. **b**, Residual fit of the observed versus predicted squared allele frequency difference, expressed as the number of standard errors of the deviation. Colours are in the palette on the right. Residuals above zero represent populations that are more closely related to each other in the data than in the best-fit tree, and are candidates for admixture. **c**, Maximum-likelihood graph allowing a migration event to improve the fit of the tree to the data.

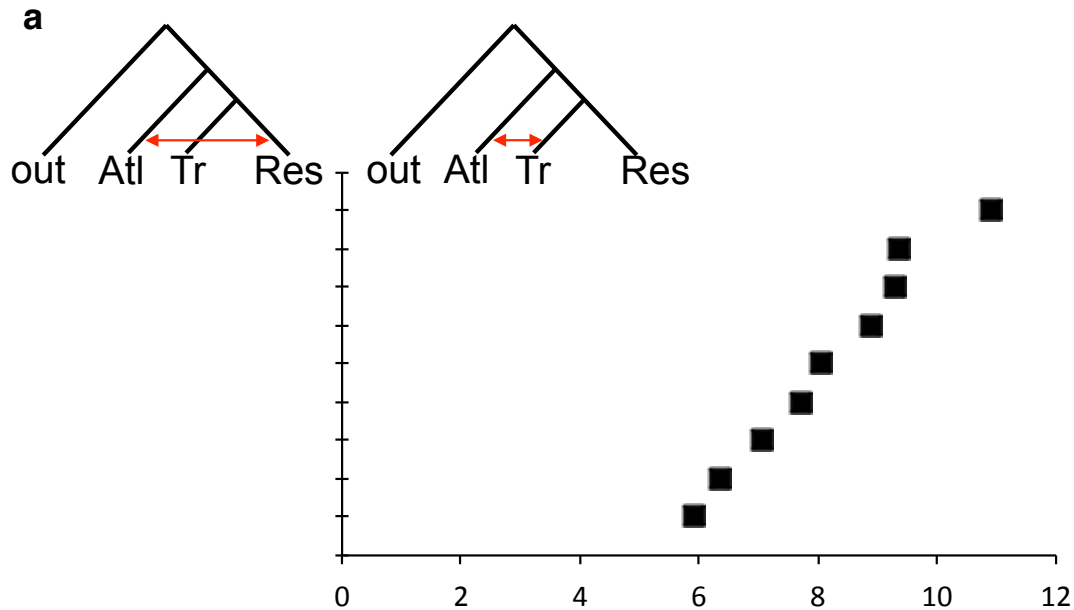

**Supplementary Figure 6a.** Plots of the Z-scores of D-statistic (ABBA-BABA) tests. D-statistic tests were performed on 9 comparisons of combinations of 3 *transients*, 3 *residents* and the Atlantic sample, with the bottlenose dolphin as the outgroup. This statistic identifies an excess of shared derived alleles between taxa, which could result from introgression or ancestral population structure. The statistic can thus be used to identify departures from ‘treeness’ of a given topology. For example, if H1, H2 and H3 are taken to denote 3 ecotypes, the test can be used to evaluate if the data are inconsistent with the null hypothesis that the tree ((H1, H2), H3), dolphin) is correct and that there has been no gene flow between H3 and either H1 or H2 or any populations related to them. The definition used here is from reference 75:

$$D = (n_{ABBA} - n_{BABA}) / (n_{ABBA} + n_{BABA})$$

where  $n_{ABBA}$  is the number of sites where H1 shares the ancestral allele with the dolphin, and H2 and H3 share a derived allele (ABBA sites); and,  $n_{BABA}$  is the number of sites where H2 shares the ancestral allele with the dolphin, and H1 and H3 share a derived allele (BABA sites). Under the null hypothesis that the given topology is the true topology, we expect an equal proportion of ABBA and BABA sites and thus  $D = 0$ . Hence a test statistic that differs significantly from 0 provides evidence either of gene flow or the tree being incorrect due to ancestral population structuring. The significance of the deviation from 0 was assessed using a Z-score based on jackknife estimates of the standard deviation of the D-statistics. This Z-score is based on the assumption that the D-statistic (under the null hypothesis) is normally distributed with mean 0 and a standard deviation equal to a standard deviation estimate achieved using the "delete-m Jackknife for unequal m" procedure. The tests were implemented in ANGSD and performed by sampling a single base at each position of the genome to remove bias caused by differences in sequencing depth.

The positive values over the critical value of 3 indicate an excess of ABBA patterns over BABA patterns in terms of the number of shared derived alleles. This indicates that the relationship among these taxa is not fully described by a bifurcating tree model, but that instead ancient admixture occurred between the ancestral populations of the North Pacific *transient* samples and the North Atlantic samples included here.

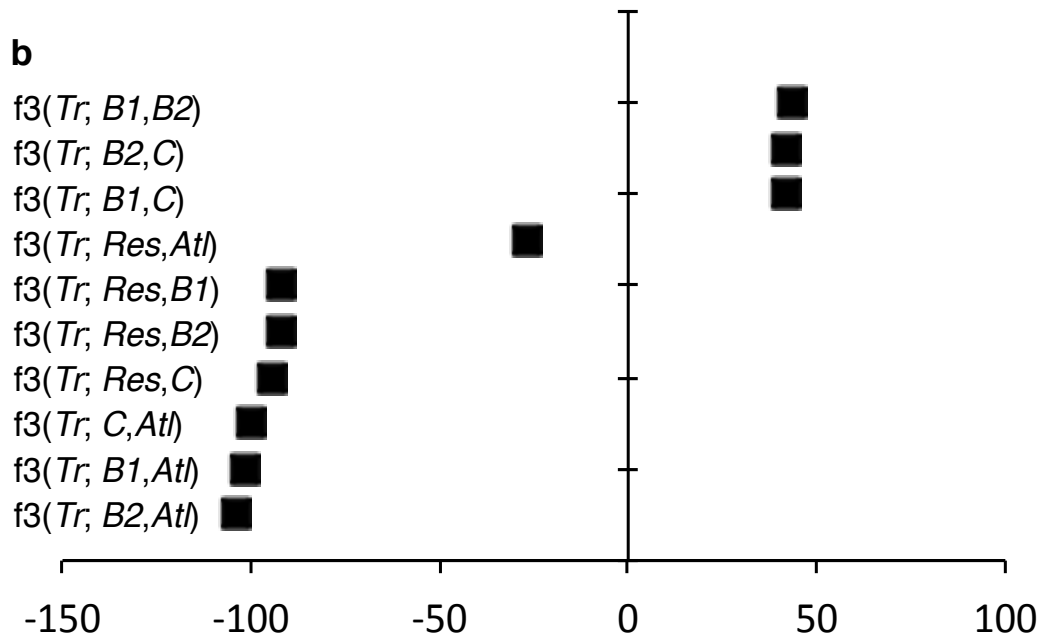

**Supplementary Figure 6b.** Plots of the Z-scores of three-population tests.

The three-population ( $f_3$ ) test, which can provide evidence of admixture, even if gene flow events occurred hundreds of generations ago<sup>26</sup>, was implemented in TreeMix to test for ‘treeness’, i.e. how well relationships can be represented by bifurcations. These tests are of the form  $f_3(A;B,C)$ , where a significantly negative value of the  $f_3$  statistic implies that population A is admixed<sup>26</sup>.  $f_3$ -statistics were computed using the estimators described in reference 26, obtaining standard errors using a block jackknife procedure over blocks of 1,000 SNPs. We find strongly negative Z-scores in the three-population test in comparisons where the *transient* ecotype is the target population and the Atlantic and/or *residents* are the source population, but not the other way around. This implies directional ancient introgression from the populations related to the *resident* and the Atlantic populations into the *transient* ecotype.

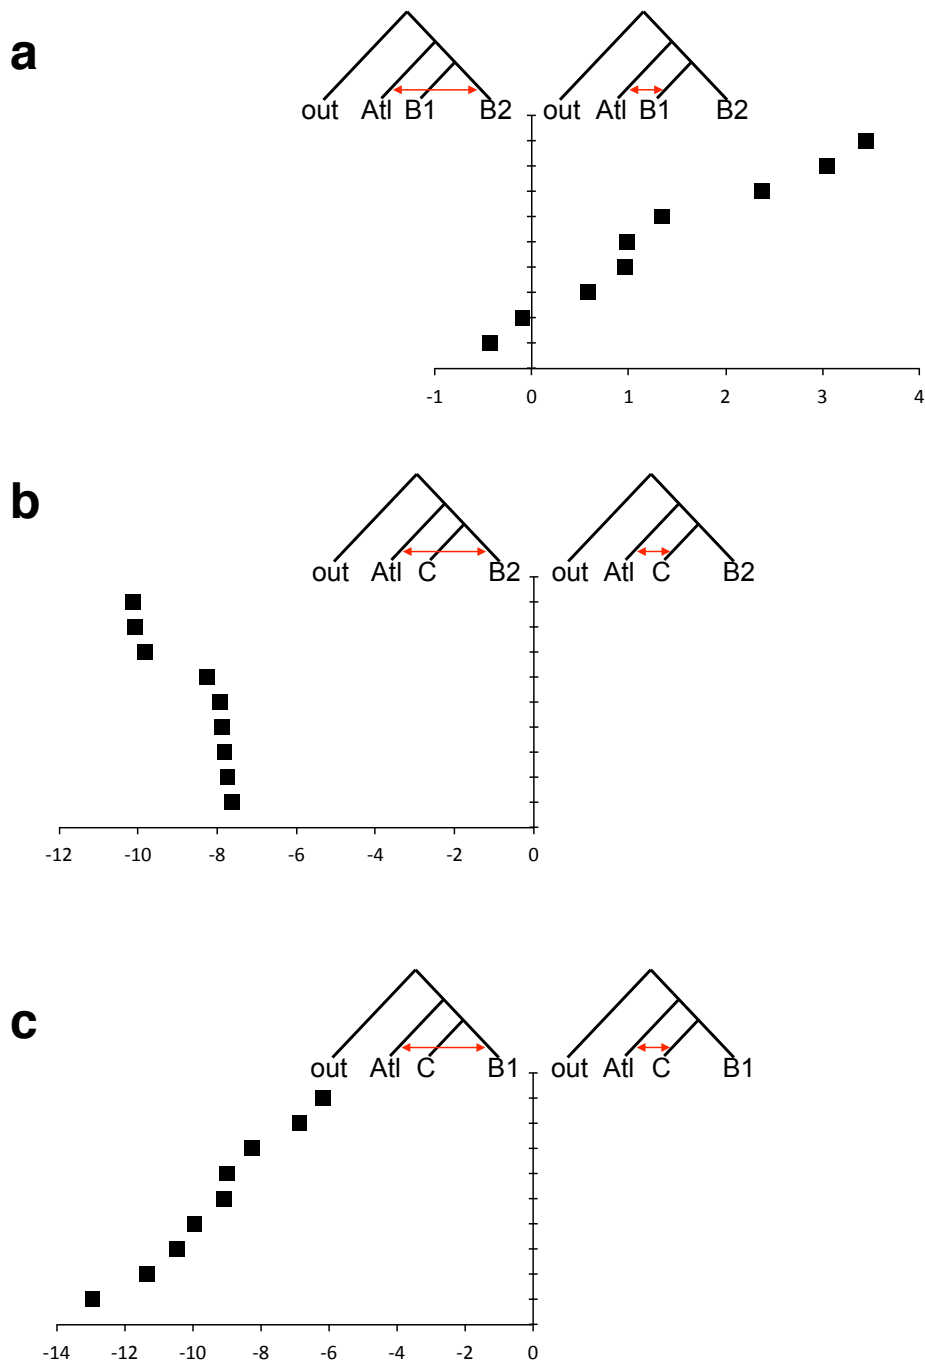

**Supplementary Figure 7.** Plots of the Z-scores from D-statistic tests performed on nine comparisons of combinations of **a**, three *type B1*, three *type B2* and the Atlantic sample; **b**, three *type C*, three *type B2* and the Atlantic sample; **c**, three *type C*, three *type B1* and the Atlantic sample; with the bottlenose dolphin as an outgroup in each comparison. In figure **a**, Z-scores are almost all below the critical value of  $\pm 3$  indicating that *type B1* and *type B2* each share a roughly equal amount of derived alleles with the Atlantic population, i.e. that there was no subsequent admixture between the Atlantic population and either *type B1* or *type B2* after *types B1* and *B2* diverged. In figures **b**, and **c**, Z-scores are strongly negative and indicate an excess of BABA patterns over ABBA patterns and that *types B1* and *B2* terms shared more derived alleles with the Atlantic population than *type C* does. This implies ancient admixture between the Atlantic population and the ancestral population of *types B1* and *B2* after they diverged from *type C*.

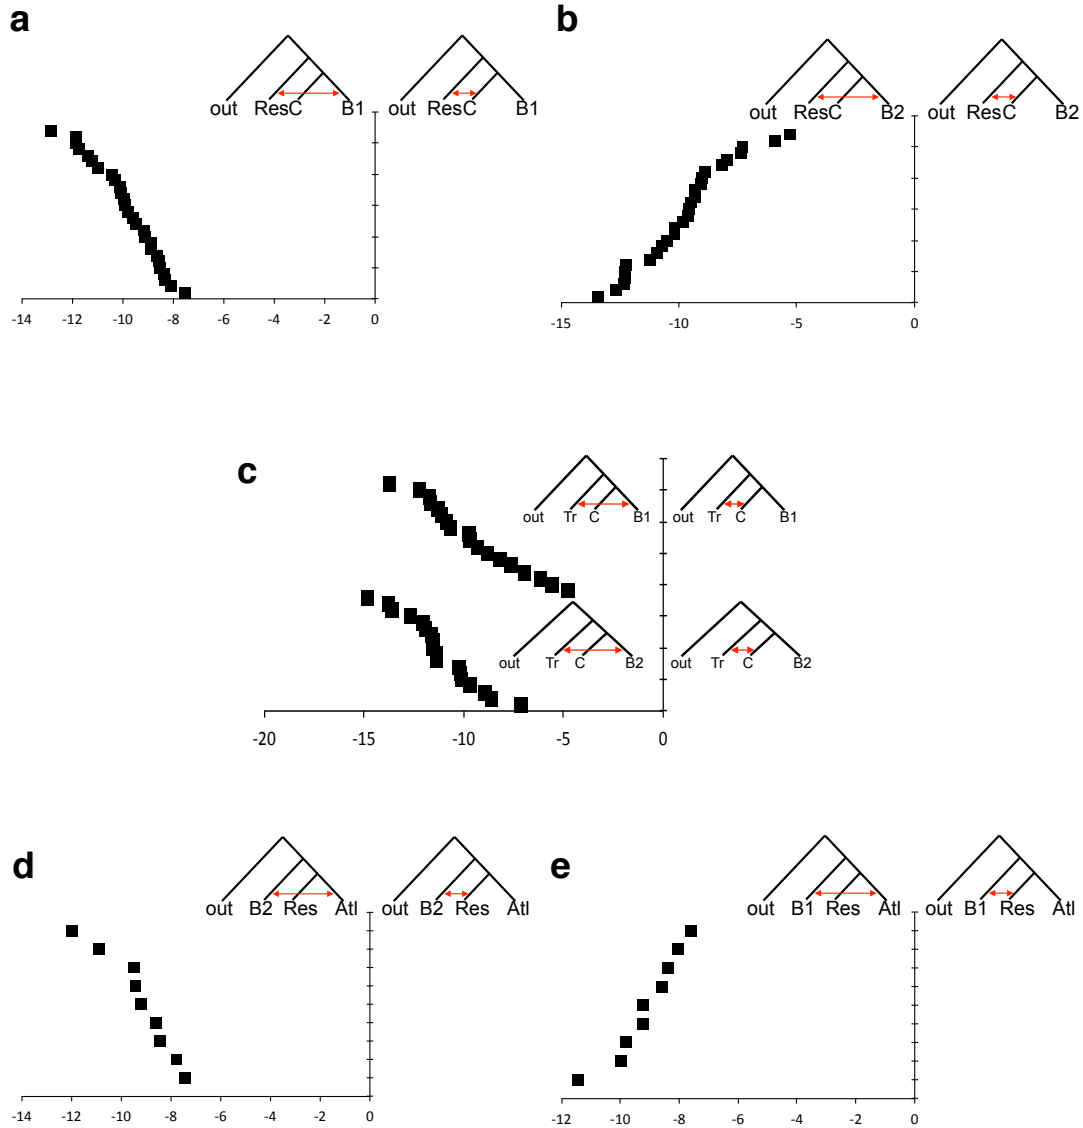

**Supplementary Figure 8.** Plots of the Z-scores from D-statistic tests. **a-c**, indicate that the Antarctic *types B1* and *B2* also share an excess of alleles with the other Northern hemisphere ecotypes relative to *type C*. This suggests that the ancient admixture event was likely between the ancestral *type B* population and a population closely related to the Atlantic, *resident* and *transient* populations, rather than multiple admixture events with each of those populations. **d**, and **e**, indicate that this admixture occurred after the *resident* and Atlantic populations split. Further results, D-statistic values and standard error estimates from all comparisons of all combinations can be found in Supplementary Data 1.

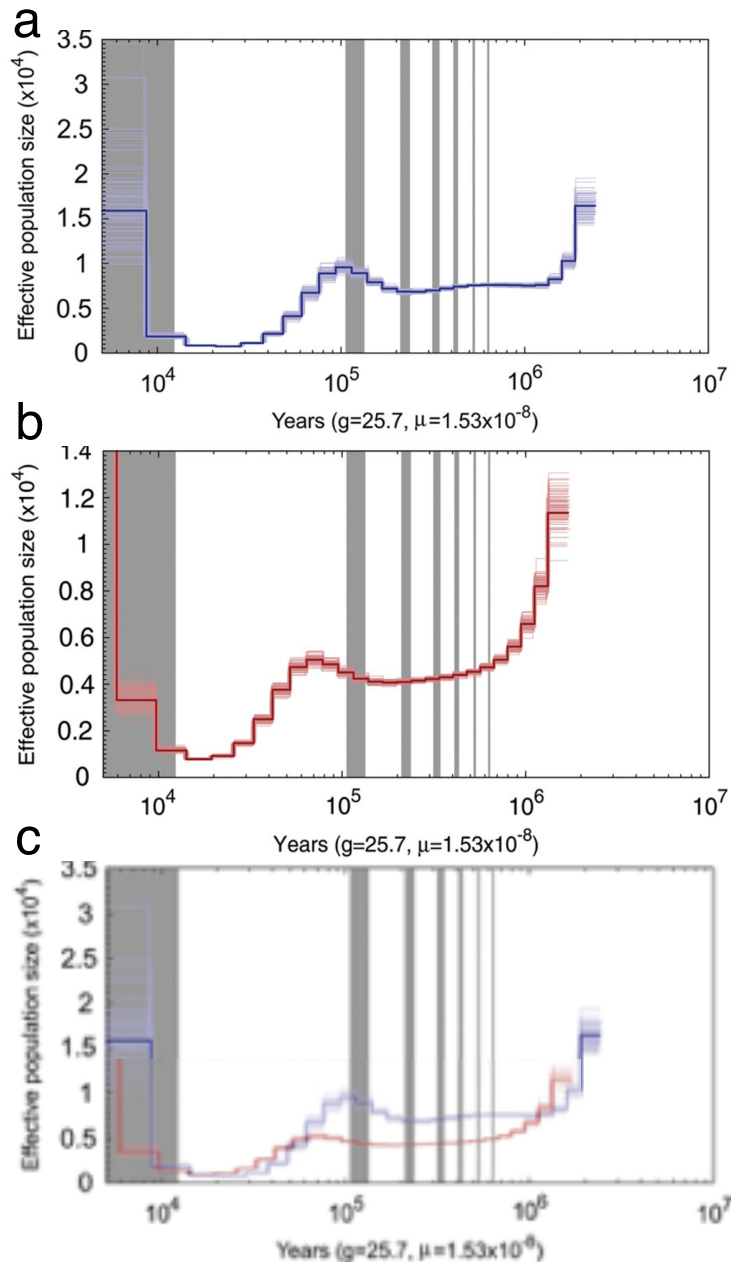

**Supplementary Figure 9.** Reassessment of a published PSMC demographic reconstruction. Previously published plots of demographic history inferred by pairwise sequential Markovian coalescent analysis (PSMC) of (a) a North Pacific resident killer whale and (b) a North Atlantic killer whale from figure 1 of Moura *et al.*<sup>17</sup> reproduced with permission from the publisher Oxford University Press (Licence Number: 3786451154395). Overlaying the two plots, (c) we observe that the two genomes show no convergence in effective population size ( $N_e$ ) prior to the date that they are estimated by the same authors to have shared a common ancestor<sup>22</sup> or even back as far as 1 MYA. This highlights the bias introduced into the analysis when comparing sequences of low and differing coverage, which results in different rates of false negative detection of heterozygote sites, producing the same effect as using a lower mutation rate for the sequence with lower coverage.

A recent study used PSMC to reconstruct ancestral changes in  $N_e$  through time using  $\sim 13\times$  and  $\sim 20\times$  coverage diploid autosomal genome sequences of a North Atlantic

killer whale (accessed ahead of publication by the consortium that generated the data) and a North Pacific killer whale respectively<sup>17</sup>. The authors interpreted the plots as being indicative of a global decline driven primarily by climate change during the last glacial period of the Pleistocene<sup>17</sup>. This study dismissed changes in connectivity having a role in the observed demographic changes as being ‘unlikely to generate the specific pattern observed (strong population decline) or the very similar profiles for each ocean<sup>17</sup>. However, PSMC heavily relies on the distribution of polymorphic sites across the genome, and in particular, the length of shared runs of homozygosity, and can be biased when heterozygous sites are wrongly called as being homozygous. PSMC plots of genomes with <20× coverage have been shown not to be directly comparable to higher coverage genomes without first applying a correction for an appropriate false negative rate of detecting heterozygotes<sup>76</sup>. Additionally, the effect of mapping short read data to a reference genome comprised of short contigs may also be problematic, especially when many contigs fall below ~50-kb (the typical size of shared fragment size from 1,000 generations ago in humans), although to the best of our knowledge, the effect of mapping to different quality reference assemblies on PSMC analysis has not been tested to date. Moura *et al.*<sup>17</sup> mapped short read data from two individual killer whales to a draft assembly of the bottlenose dolphin (assembly turTru1, Ensembl database release 69.1) made up of 0.24 million scaffolds, with a scaffold N50 of 116,287, in which 94% of the scaffolds, comprising approximately 25% of the genome, are less than 50-kb long. Moura *et al.*<sup>17</sup> thereby generated a 20× average coverage sequence and a 13× average coverage sequence, and did not apply a correction for differences in false negative rate of detection of heterozygotes due to the difference in coverage. The PSMC plots from the two genomes presented in Moura *et al.*<sup>17</sup> do not converge in effective population size even though the two individuals shared a relatively recent common ancestor (TMRCA estimated at ~150 KYA by the same authors<sup>22</sup>).



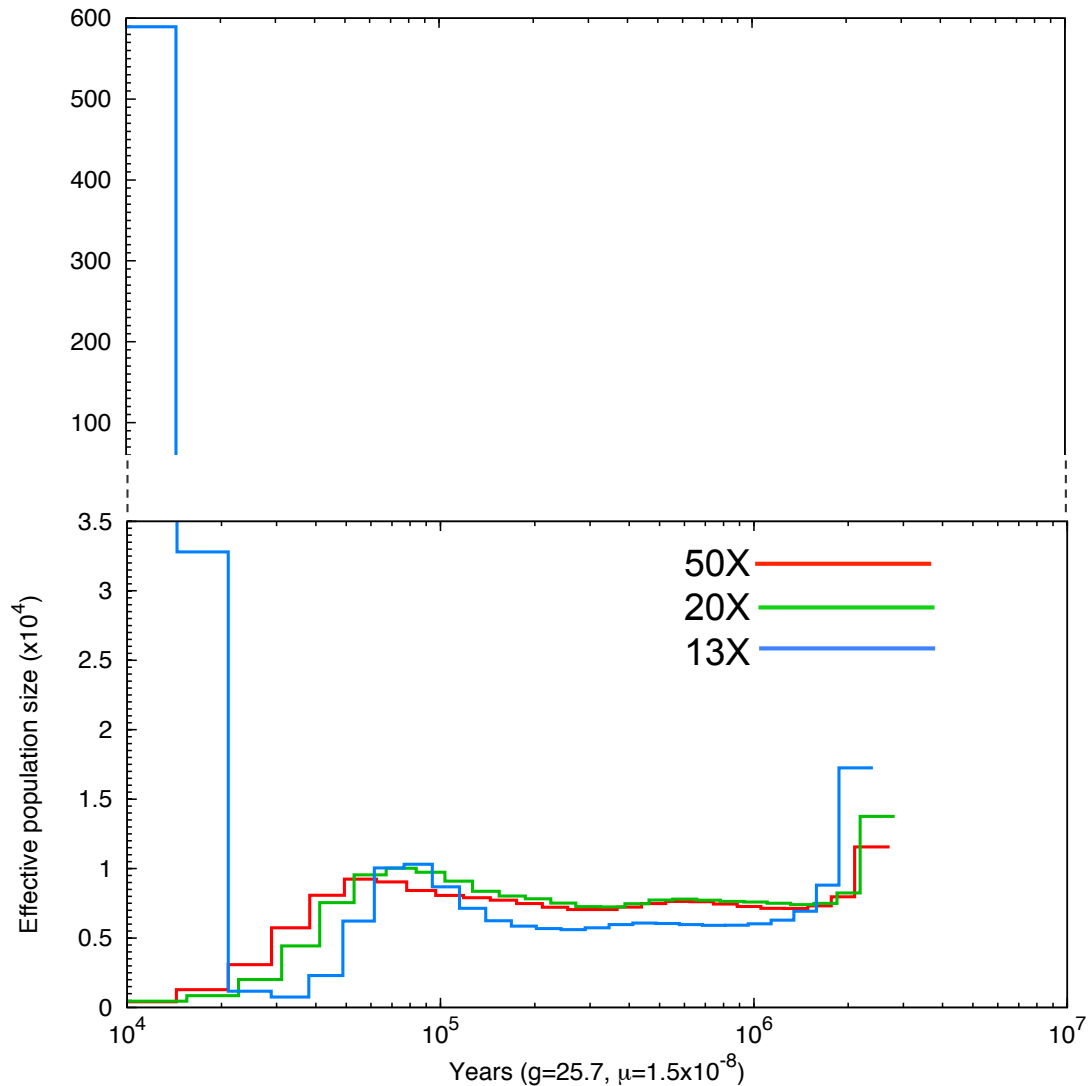

**Supplementary Figure 10.** PSMC plots of inferred demographic history of the same individual using 13 $\times$ , 20 $\times$  and 50 $\times$  coverage of sequencing data. In order to better understand if these methodological issues (<20 $\times$  coverage sequence data mapped to a highly fragmented reference) led to erroneous inference of the demographic histories and the underlying processes in this previous study<sup>17</sup>, PSMC was used to analyse down-sampled versions of the high coverage North Atlantic killer whale genome. A 50 $\times$  bam file was produced by mapping the short read data generated from the North Atlantic killer whale to scaffolds of the autosomal regions of the high quality killer whale reference genome that were greater than 10-Mb in length, totaling 1.5 Gb and which had all repeat regions masked as noted above. The 50 $\times$  coverage bam file was then down-sampled to produce 13 $\times$  and 20 $\times$  coverage bam files. A consensus sequence of each of the three bam files was then generated in fastq format sequentially using: firstly, SAMtools mpileup command with the  $-C50$  option to reduce the effect of reads with excessive mismatches; secondly, bcftools view  $-c$  to call variants; lastly, vcfutils.pl vcf2fq to convert the vcf file of called variants to fastq format with further filtering to remove sites with less than a third or more than double the average depth of coverage and Phred quality scores less than 30. The PSMC inference was then carried out using the recommended input parameters for human autosomal data<sup>21</sup>, i.e. 25 iterations, with maximum TMRCA ( $T_{max}$ ) = 15, number of atomic time intervals ( $n$ ) = 64 (following the pattern (1\*4 + 25\*2 + 1\*4 + 1\*6)), and

initial theta ratio ( $r$ ) =5. For the initial comparison between the 13×, 20× and 50× coverage North Atlantic genomes, a generation time of 25.7 years and a mutation rate of  $1.53 \times 10^{-8}$  substitutions/nucleotide/generation were applied, as per reference 17. Comparison of the PSMC inference plots based on the 13×, 20× and 50× coverage files, generated from the same individual, highlighted the impact of coverage on inference of both the magnitude of  $N_e$  at any given time and the timing of the changes in  $N_e$ , consistent with findings by a previous study<sup>76</sup>. In particular, estimates of  $N_e$  in more recent times based on the 13× genome assembly differed markedly to inferred  $N_e$  from the 20× and 50× genome assemblies. This is a consequence of a higher false negative detection rate of heterozygote sites in the 13× genome assembly, producing the same effect as a smaller mutation rate would have on the plot. The PSMC plots of the 20× and 50× coverage North Atlantic genome were almost identical both regarding the timing and the magnitude of demographic events.

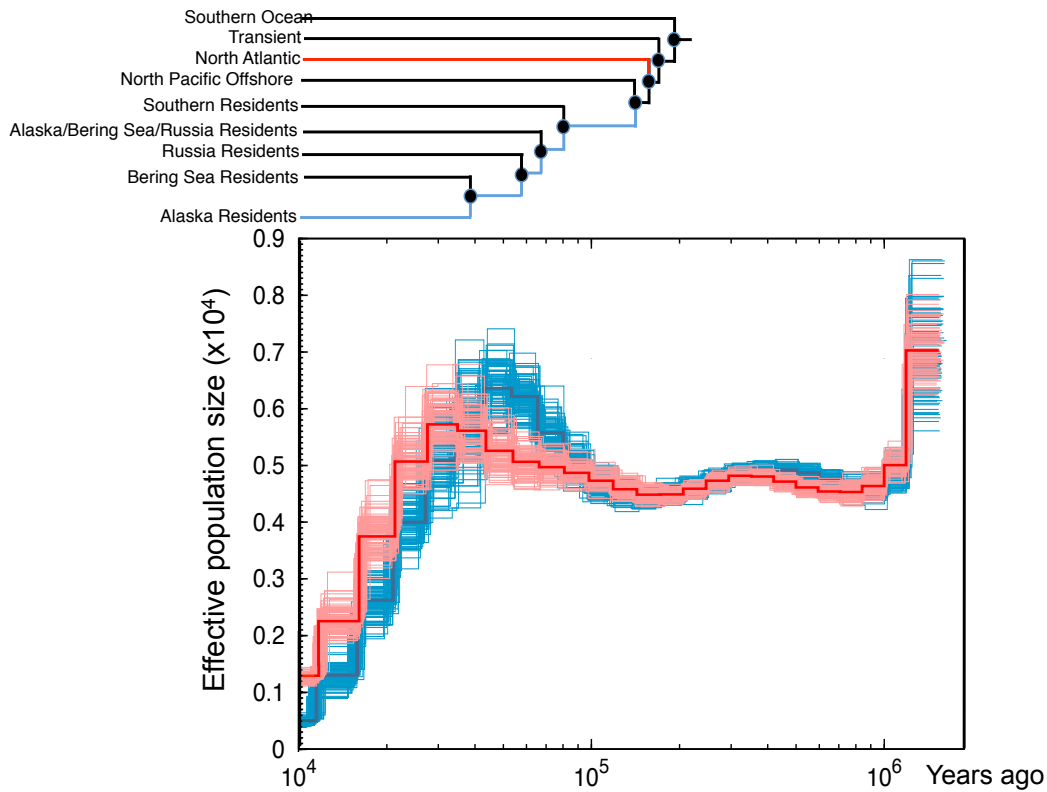

**Supplementary Figure 11.** Historical population sizes of a North Atlantic (red) and North Pacific resident killer whale (blue) inferred by pairwise sequential Markovian coalescent analysis (PSMC). All three plots of the North Atlantic killer whale genome (13×, 20× & 50×) in Supplementary Figure 10 are consistent in estimating a marked decline in  $N_e$  between 100,000 years and 20,000 years ago. To better infer the process underlying this decline in  $N_e$ , PSMC was used to compare equal coverage (20×) assemblies of the North Pacific and North Atlantic genomes. A 20× bam file was generated for the North Pacific killer whale using data from the short read archive (SRP035610)<sup>17</sup> and mapped as above. As with other inference methods based on coalescent theory, PSMC can only infer scaled times and population sizes. To convert these estimates into real time and size, all scaled results need to be divided by the mutation rate. To allow comparison of the relative timing of population splits with a published time-calibrated nuclear phylogeny based on RAD-seq data we scaled the PSMC plot using the same mutation rate as reference 22. Although the two papers by Moura *et al.*<sup>17,22</sup> were published almost concurrently, they use two different mutation rates for nuclear genomic data for each analysis:  $1.53 \times 10^{-8}$  substitutions/nucleotide/generation for PSMC<sup>17</sup> and an estimate almost double this rate for their time-calibrated phylogeny of  $2.83 \times 10^{-8}$  substitutions/nucleotide/generation, based on their given rate of 0.0011 substitutions per site per million years<sup>22</sup> and a generation time of 25.7 years as above. We therefore scaled the PSMC plots by a generation time of 25.7 years and a mutation rate of  $2.83 \times 10^{-8}$  substitutions/nucleotide/generation. A total number of 100 bootstraps were performed. The combined PSMC plot of both genomes is shown compared with population split times from a previously published time-calibrated phylogeny<sup>22</sup> that supports the inference that changes in inferred  $N_e$  by PSMC are at least partially driven by changes in connectivity. The  $x$ -axis gives time measured by pairwise sequence divergence and the  $y$ -axis gives the effective population size measured by the scaled mutation rate of  $2.83 \times 10^{-8}$  substitutions

/nucleotide/generation and assuming a generation time of 25.7 years. Thin light lines of the same colour correspond to the 95% confidence intervals of PSMC inferences on 100 rounds of bootstrapped sequences. Insert shows a time-calibrated nuclear marker phylogeny adapted from reference 22, scaled using the same mutation rate and plotted on the same  $x$ -axis as the PSMC plots. The branches leading to the populations used in the PSMC plots are coloured accordingly and highlight that population splits are followed by changes in inferred  $N_e$ .

a) divergence without gene flow

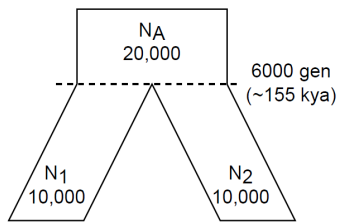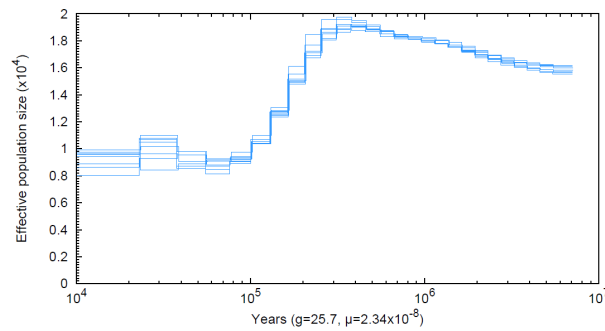

b) divergence with gene flow

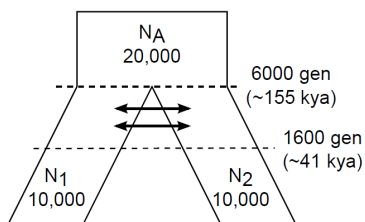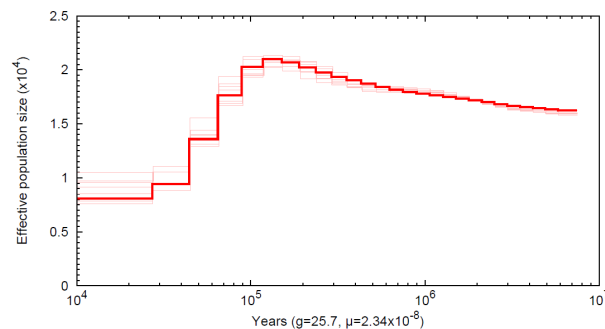

**Supplementary Figure 12.** Effect of population structure and divergence on PSMC.

Finally, to further understand the relationship between connectivity and PSMC inference we simulated data consistent with a population split using *scrm*<sup>77</sup> and plotted the changes in effective population size inferred by PSMC. We considered two models of population divergence where an ancestral population of size  $N_A=20,000$  splits 6,000 generations ago into two descending populations of size  $N_1=N_2=10,000$ . In **a)** populations become isolated after the split event and diverge without gene flow, representing a scenario of a sudden change in connectivity; whereas in **b)** there is a period of symmetric gene flow ( $2Nm=20$ ) until 1600 generations ago, mimicking a gradual change in the connectivity of populations. We considered models with no changes in the size of populations, which in total remains 20,000, and hence these models could represent scenarios of divergence due to vicariance without founder events. As can be seen in the plots on the right, reductions in the connectivity of populations due to population divergence can lead to changes in the effective sizes inferred with PSMC. For both models, even though we did not simulate any demographic changes due to population bottlenecks or expansions, PSMC infers a gradual decline on the effective sizes after populations become more isolated, coinciding with the reduction in connectivity among populations. Note that these simulations are not intended to capture the recent demographic history of the killer whales, but rather illustrate that changes in population structure due to population divergence can lead to changes in the inferred PSMC effective sizes. We simulated and analysed with PSMC eight independent datasets for each model (corresponding to the different lines in the PSMC plots), assuming a mutation rate  $\mu$  of  $2.34 \times 10^{-8}$  per site per generation, an arbitrary recombination rate set to  $0.80 * \mu$ , and a generation time of 25.7 years. Each datasets consisted of 10 blocks of 100 Mb (total of 1,000 Mb) sampled from a single diploid individual from population 1, generated using *scrm* with the following command lines: a) `ms 2 10 -t 93600 -r 74880 100000000 -I 2 2 0 0.0 -n 1 1 -n 2 1 -G 0.0 -ej 0.15 2 1 -en 0.15 1 2`; b) `ms 2 10 -t 93600 -r 74880 100000000 -I 2 2 0 0.0 -n 1 1 -n 2 1 -G 0.0 -m 1 2 0 -m 2 1 0 -em`

0.04 1 2 80 -em 0.04 2 1 80 -ej 0.15 2 1 -em 0.15 1 2 0 -em 0.15 2 1 0 -en  
0.15 1 2.

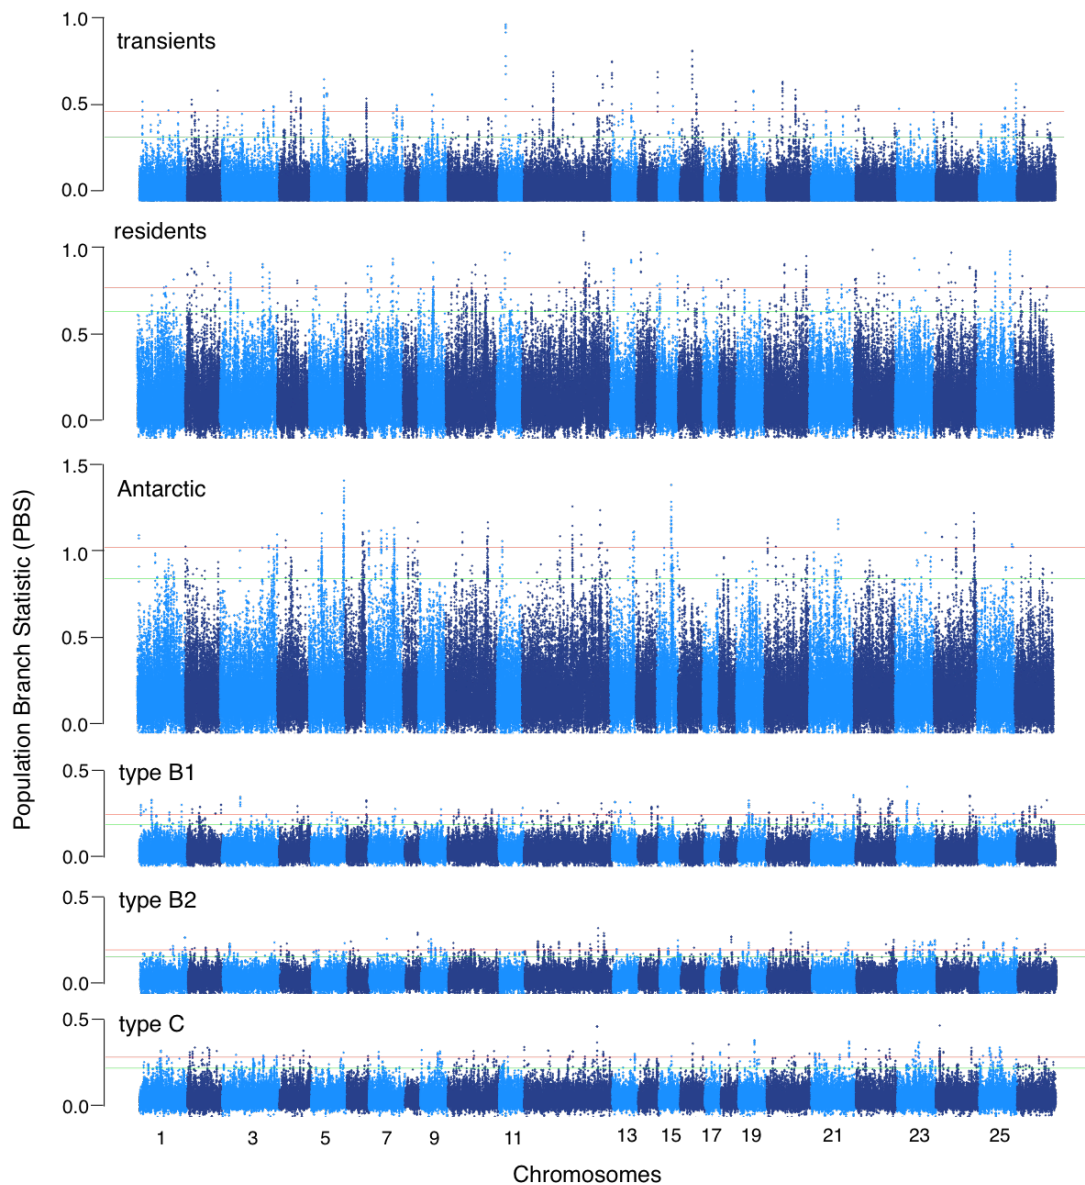

**Supplementary Figure 13.** Population-specific allele frequency changes estimated as  $F_{ST}$ -based branch lengths in 50-kb sliding windows. The mean population branch statistic (PBS) is highest along the two branches that were inferred by TreeMix to have undergone the highest amounts of drift: the branch to the common ancestor of the Antarctic types and the branch to the *resident* ecotype. The green and red lines indicate the 99.5 and 99.9 percentiles respectively. Several distinct peaks are seen in the Manhattan plots for each branch, these are further explored using PBS estimates at the exon level to identify candidate loci that have potentially evolved under selection.

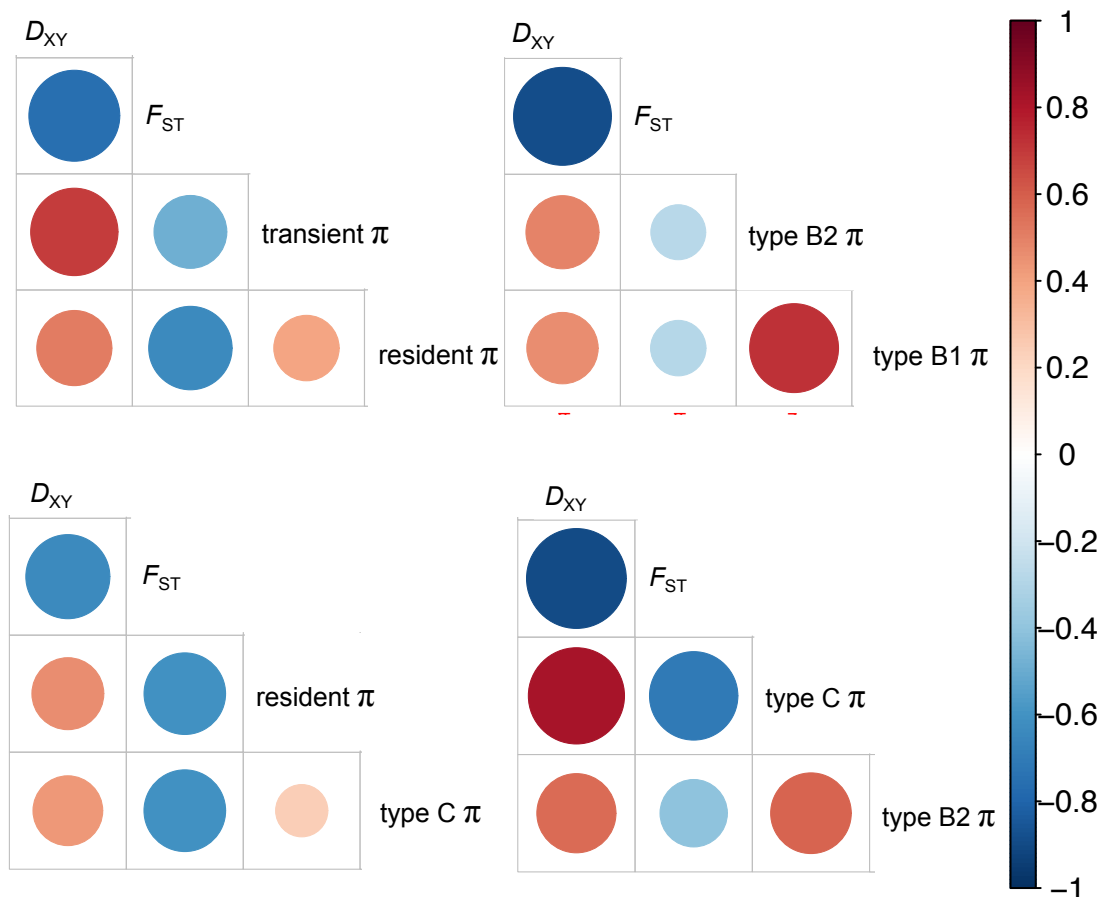

**Supplementary Figure 14.** Correlations between (50-kb) window-based estimates of genome-wide divergence ( $D_{XY}$ ), differentiation ( $F_{ST}$ ) and nucleotide diversity ( $\pi$ ) for the pairwise comparison between ecotypes shown in Fig. 4A. Red circles indicate a positive relationship, blue a negative one; colour intensity and circle size are proportional to Spearman's correlation coefficient. Shared regions of high differentiation, but low diversity and divergence are likely to have been regions on linked selection on the ancestral form, which would remove diversity and result in rapid lineage sorting of allele frequencies due to differential drift and selection in the derived forms.



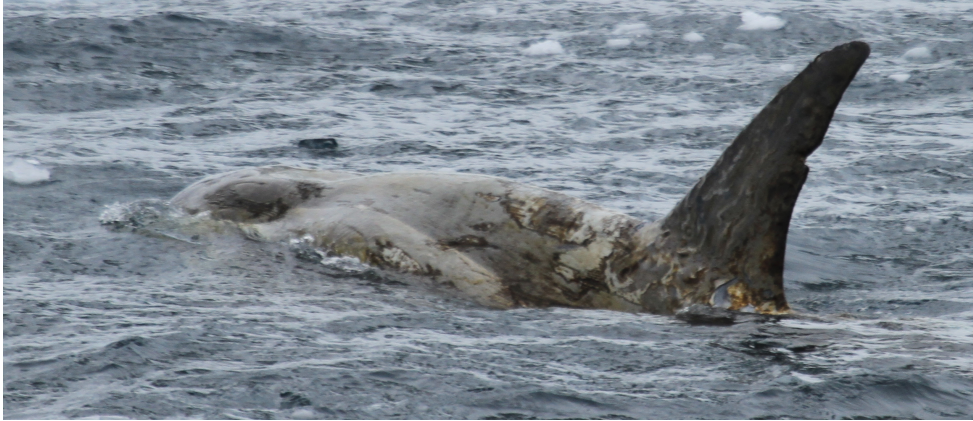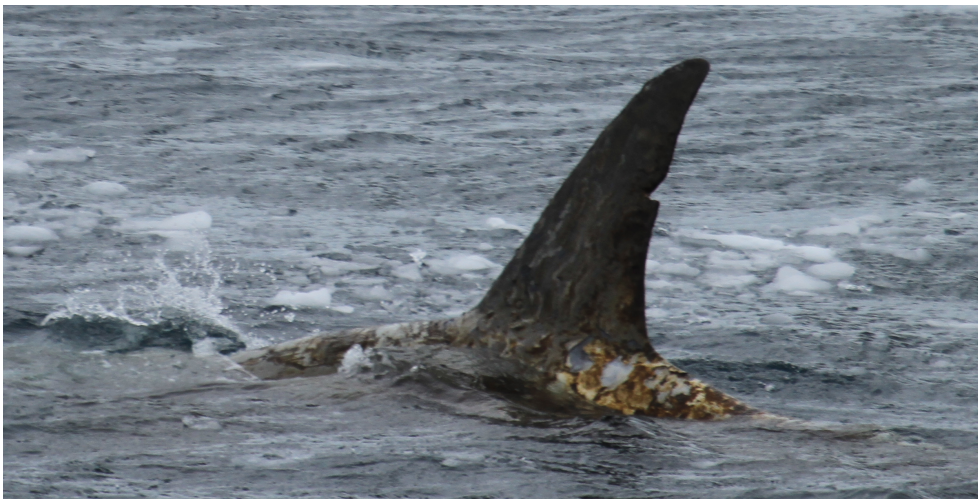

**Supplementary Figure 15.** Photograph of an Antarctic *type B1* killer whale photographed by Conor Ryan in the Gerlache Strait of the Antarctic Peninsula on the 4<sup>th</sup> December 2015. The individual was travelling alone and moving slowly. The skin was peeling off as evidenced in the photograph. Those of us that have conducted field studies over many years have not previously encountered any killer whales with a skin condition such as this. A previous study<sup>42</sup> has detailed that Antarctic killer whales make rapid round-trips of up to 9,400 km from Antarctica (less than 60° South) to subtropical waters (30-37° South) where sea surface temperature was approximately 20-25°C warmer using satellite tag data. Durban & Pitman<sup>42</sup> additionally documented that the same individuals were encountered with the different amounts of accumulation of diatoms on their skin at different times. They hypothesised that these rapid migrations to warm water may allow for epidermal tissue regeneration without the thermal cost that would be incurred if skin regeneration took place in Antarctic waters<sup>42</sup>. The *type B1* individual photographed by Conor Ryan in Antarctic waters highlights that skin regeneration may be a strong selective force. The results of this study highlight genomic adaptation of a gene (*FAM83H*) associated with epidermal regeneration along the branch to the ancestral Antarctic lineage that include four non-synonymous substitutions.

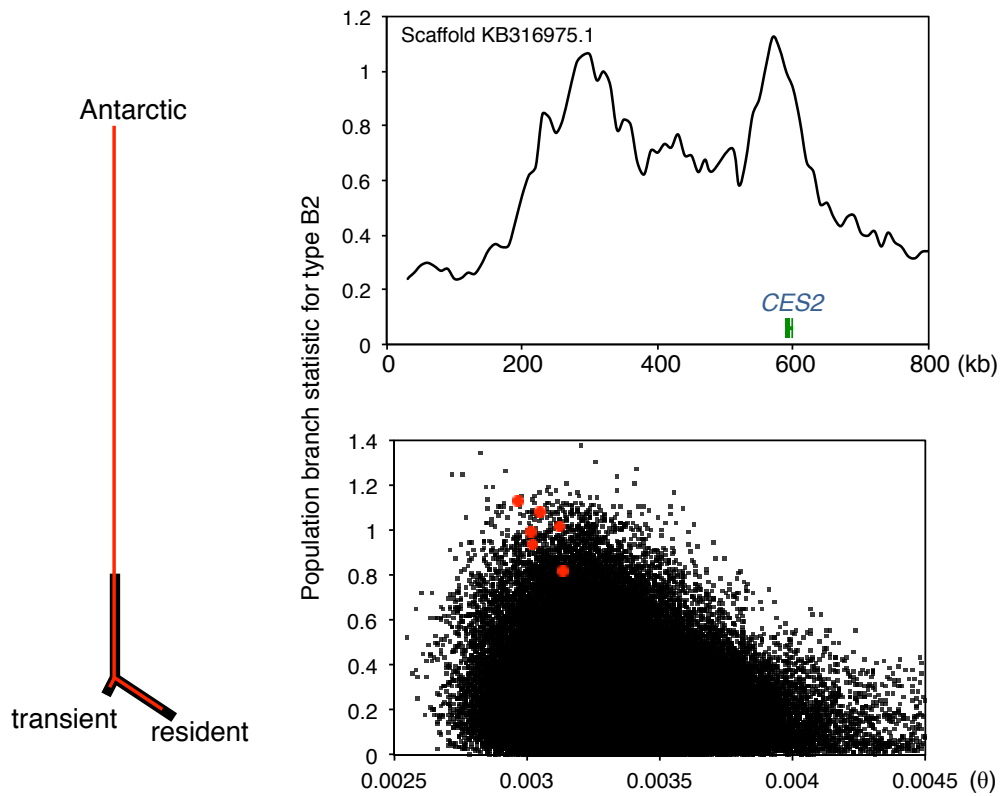

**Supplementary Fig 16.** Population-specific allele frequency changes are indicated by the  $F_{ST}$ -based branch lengths (red) for the *CES2* gene overlaid on the genome-wide average branch lengths (black), indicating substantial differentiation along the branch to the common ancestor of the Antarctic ecotypes; the distribution of population branch statistic (PBS) along scaffold KB317017 and as a function of mutation rate ( $\theta$ ) calculated in 50-kb sliding windows. Windows overlapping the *CES2* gene are coloured red and are in the 99-99.9 percentile.

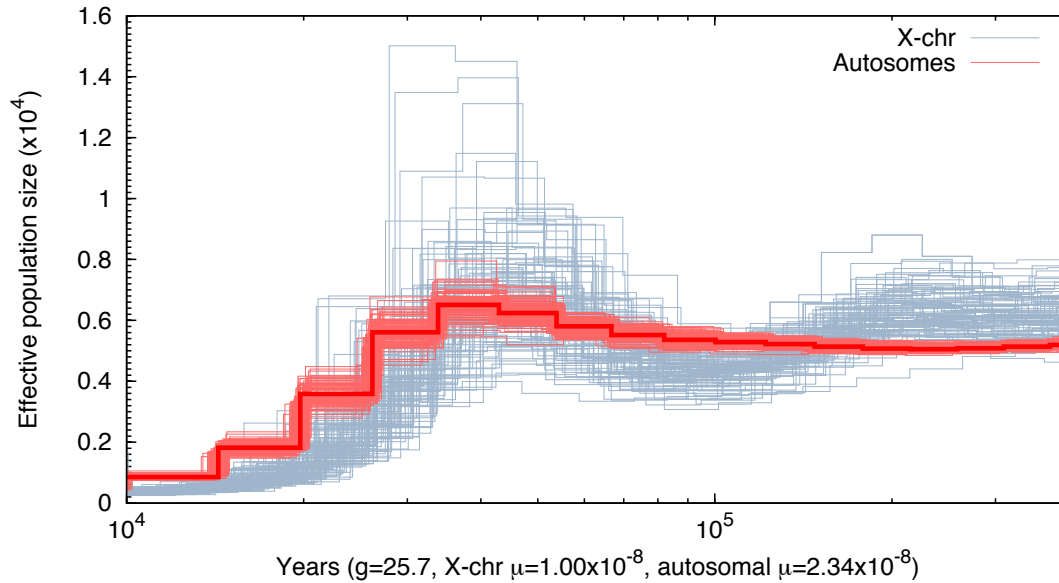

**Supplementary Fig. 17**, PSMC estimates of changes in  $N_e$  over time inferred from the autosomes ( $N_{eA}$ , red) and the X-chromosome ( $N_{eX}$ , grey) of the high coverage genome sequence of a North Atlantic female killer whale. Thick lines represent the median, thin light lines of the same colour correspond to 100 rounds of bootstrapping. To make the autosomal plot and X-chromosome synchronise in the inferred timing of demographic change, requires scaling the X-chromosome plot by a mutation rate of  $1.0 \times 10^{-8}$  substitutions/nucleotide/generation if the autosomal mutation rate is assumed to be  $2.34 \times 10^{-8}$  substitutions/nucleotide/generation<sup>20</sup>. This requires a male-to-female mutation rate ratio to be  $>100$ , making it seemingly biologically unrealistic.

## Supplementary Tables

**Supplementary Table 1.** Overview of sample information and sequencing statistics and accession numbers in the European Nucleotide Archive (study accession number: PRJEB7375). The number of sites covered at  $\geq 1$  and  $\geq 2\times$  in the repeat-masked genomes are given. Sample ID's are from the SWFSC Marine Mammal and Sea Turtle Research Collection database.

| Ecotype   | Sample ID     | No. sites covered 1X | No. sites covered $\geq 2X$ | Accession Number |
|-----------|---------------|----------------------|-----------------------------|------------------|
| transient | Z79751        | 912,838,213          | 581,568,661                 | ERS554458        |
|           | Z40246        | 450,961,532          | 117,156,041                 | ERS554453        |
|           | Z94446        | 1,078,915,238        | 926,346,260                 | ERS554461        |
|           | Z57910        | 922,002,453          | 620,949,972                 | ERS554454        |
|           | Z57919        | 896,799,085          | 569,918,216                 | ERS554455        |
|           | Z67975        | 848,029,101          | 499,244,722                 | ERS554457        |
|           | Z62471        | 816,837,489          | 453,988,372                 | ERS554456        |
|           | Z93820        | 785,932,259          | 437,725,622                 | ERS554460        |
|           | Z79759        | 1,065,456,348        | 919,518,022                 | ERS554459        |
|           | Z28549        | 324,432,898          | 64,246,642                  | ERS554452        |
| resident  | Z62250        | 520,118,250          | 209,645,749                 | ERS554451        |
|           | Z126161       | 910,563,765          | 592,486,217                 | ERS554443        |
|           | Z35322        | 936,077,728          | 637,183,391                 | ERS554450        |
|           | Z126163       | 1,018,566,267        | 786,136,456                 | ERS554444        |
|           | Z31868        | 922,308,161          | 609,051,768                 | ERS554449        |
|           | Z126165       | 578,454,141          | 248,968,267                 | ERS554445        |
|           | Z126178       | 991,162,998          | 729,347,947                 | ERS554448        |
|           | Z126167       | 966,067,389          | 686,237,346                 | ERS554446        |
|           | Z126169       | 939,922,125          | 639,478,143                 | ERS554447        |
|           | Z126158       | 987,961,149          | 727,028,730                 | ERS554442        |
| Z157515   | 1,135,204,773 | 1,106,693,447        | SRP035610                   |                  |
| type C    | Z88353        | 669,462,810          | 299,227,990                 | ERS554471        |
|           | Z26627        | 856,354,026          | 519,220,516                 | ERS554468        |
|           | Z26626        | 445,290,470          | 123,931,174                 | ERS554467        |
|           | Z45804        | 914,040,648          | 593,451,716                 | ERS554470        |
|           | Z26614        | 888,571,774          | 553,219,110                 | ERS554462        |
|           | Z26619        | 990,054,479          | 729,620,205                 | ERS554464        |
|           | Z45800        | 710,495,576          | 336,430,867                 | ERS554469        |
|           | Z26620        | 874,869,923          | 546,880,892                 | ERS554465        |
|           | Z26617        | 681,130,270          | 315,413,786                 | ERS554463        |
|           | Z26623        | 949,838,075          | 639,223,700                 | ERS554466        |

**Supplementary Table 1. Continued.**

|          |         |               |               |             |
|----------|---------|---------------|---------------|-------------|
|          | Z78580  | 730,740,473   | 372,942,192   | ERS554426   |
|          | Z78581  | 509,607,459   | 171,867,125   | ERS554427   |
|          | Z124038 | 885,646,983   | 563,137,421   | ERS554428   |
| type B1  | Z32005  | 657,449,966   | 267,338,920   | ERS554424   |
|          | Z124047 | 183,708,091   | 26,914,304    | ERS554429   |
|          | Z88344  | 809,373,312   | 436,925,282   | ERS554430   |
|          | Z73077  | 1,150,930,500 | 1,096,203,119 | ERS554425   |
|          | Z124036 | 651,122,155   | 332,981,742   | ERS554431   |
|          | Z124043 | 762,936,262   | 389,551,088   | ERS554432   |
|          | Z31884  | 1,028,784,218 | 804,933,446   | ERS554433   |
|          | Z32009  | 1,032,340,577 | 816,648,000   | ERS554434   |
|          | Z40882  | 952,005,121   | 673,561,894   | ERS554435   |
| type B2  | Z78595  | 944,613,699   | 672,705,181   | ERS554436   |
|          | Z92354  | 574,697,414   | 210,386,441   | ERS554437   |
|          | Z92363  | 870,395,218   | 526,946,499   | ERS554439   |
|          | Z92362  | 135,880,034   | 18,881,497    | ERS554438   |
|          | Z92365  | 845,849,210   | 524,230,712   | ERS554440   |
|          | Z92367  | 596,339,488   | 249,249,018   | ERS554441   |
| Atlantic |         | 1,199,341,331 | 1,191,738,985 | PRJNA167475 |

**Supplementary Table 2.** A comparison of mean  $F_{ST}$  values estimated from low coverage whole genome sequencing (WGS) data generated for this study and high coverage published SNP-typing<sup>11</sup> and RAD-seq data<sup>19</sup>.  $F_{ST}$  estimates from the RAD-seq data are from Table 1 of ref 19 and are based on those inferred by the authors to be putatively neutral loci and exclude 347 outliers out of a total of 3,281 SNPs. These estimates derived from the RAD-seq data are therefore expected to be marginally downwardly biased compared to the WGS and SNP-typing estimates.  $F_{ST}$  values based on multi-allelic microsatellite data are biased by high heterozygosity, thereby reducing  $F_{ST}$ , so that values between microsatellite and SNP analyses are therefore not directly comparable.

|                                             | WGS  | SNP-typing | RAD-seq                                                                                                  |
|---------------------------------------------|------|------------|----------------------------------------------------------------------------------------------------------|
| <i>Between Antarctic v Pacific ecotypes</i> |      |            |                                                                                                          |
| type B1 v resident                          | 0.56 | 0.68       | -                                                                                                        |
| type B2 v resident                          | 0.57 | 0.64       | -                                                                                                        |
| type C v resident                           | 0.57 | 0.61       | -                                                                                                        |
| type B1 v transient                         | 0.37 | 0.34       | -                                                                                                        |
| type B2 v transient                         | 0.4  | 0.34       | -                                                                                                        |
| type C v transient                          | 0.39 | 0.30       | -                                                                                                        |
| <i>Between Pacific ecotypes</i>             |      |            |                                                                                                          |
| transient v resident                        | 0.32 | 0.28       | (SR v AT) 0.30<br>(SR v CT) 0.29<br>(AR v AT) 0.27<br>(AR v CT) 0.26<br>(BS v AT) 0.27<br>(BS v CT) 0.26 |
| <i>Between Antarctic ecotypes</i>           |      |            |                                                                                                          |
| type B1 v type B2                           | 0.09 | 0.141      | -                                                                                                        |
| type B2 v type C                            | 0.13 | 0.103      | -                                                                                                        |
| type B1 v type C                            | 0.13 | 0.103      | -                                                                                                        |

**Supplementary Table 3.** Counts of inferred transitions and transversions from the ancestral state based on comparison with the bottlenose dolphin genome sequence at third codon positions found in type B1, and counts of sites in the two individuals of each of the other four ecotypes in which only the ancestral rather than the derived state were found. This provides an account of the accumulation of derived alleles along the branch to type B1 allowing the estimation of an approximate time to most recent common ancestor.

| Transitions from ancestral state | Number of transitions from ancestral state in type B1 | <u>Number of sites with ancestral rather than derived state</u> |         |          |          |           |           |        |        |
|----------------------------------|-------------------------------------------------------|-----------------------------------------------------------------|---------|----------|----------|-----------|-----------|--------|--------|
|                                  |                                                       | type B2                                                         | type B2 | resident | resident | transient | transient | type C | type C |
| T->C                             | 2639                                                  | 28                                                              | 25      | 42       | 40       | 35        | 38        | 23     | 22     |
| C->T                             | 3546                                                  | 89                                                              | 78      | 198      | 206      | 200       | 189       | 87     | 88     |
| A->G                             | 2477                                                  | 26                                                              | 25      | 53       | 52       | 47        | 47        | 29     | 29     |
| G->A                             | 3131                                                  | 61                                                              | 72      | 169      | 167      | 168       | 162       | 77     | 80     |
| Total                            | 11793                                                 | 204                                                             | 200     | 462      | 465      | 450       | 436       | 216    | 219    |

| Transversions from ancestral state | Number of transversions from ancestral state in type B1 | <u>Number of sites with ancestral rather than derived state</u> |         |          |          |           |           |        |        |
|------------------------------------|---------------------------------------------------------|-----------------------------------------------------------------|---------|----------|----------|-----------|-----------|--------|--------|
|                                    |                                                         | type B2                                                         | type B2 | resident | resident | transient | transient | type C | type C |
| GA->C                              | 1979                                                    | 11                                                              | 7       | 36       | 37       | 33        | 36        | 12     | 13     |
| GA->T                              | 1498                                                    | 9                                                               | 10      | 22       | 23       | 22        | 21        | 8      | 9      |
| CT->A                              | 1825                                                    | 16                                                              | 14      | 35       | 34       | 33        | 32        | 21     | 12     |
| CT->G                              | 1995                                                    | 14                                                              | 15      | 30       | 30       | 28        | 31        | 13     | 13     |
| Total                              | 7297                                                    | 50                                                              | 46      | 123      | 124      | 116       | 120       | 54     | 47     |

**Supplementary Table 4.** Summary results for the three-population test of the form  $f_3(A;B,C)$ , where a significantly negative value of the  $f_3$  statistic implies that population A is admixed<sup>26</sup>. The three-population tests were re-estimated with the Atlantic genome added, which resulted in additional inferred admixture events among ecotypes. These results are reported in Supplementary Table 5.

| Target population | Source population 1 | Source population 2 | F3 statistic | SE ( $F$ -statistic) | Z-score |
|-------------------|---------------------|---------------------|--------------|----------------------|---------|
| type B1           | type B2             | resident            | -0.0017      | $9.0 \times 10^{-6}$ | -186.4  |
| type B1           | type B2             | transient           | -0.0015      | $7.6 \times 10^{-6}$ | -193.4  |
| type B1           | type B2             | type C              | -0.0007      | $5.7 \times 10^{-6}$ | -125.9  |
| type B1           | resident            | transient           | 0.0168       | $3.2 \times 10^{-5}$ | 532.8   |
| type B1           | resident            | type C              | -0.0006      | $1.1 \times 10^{-5}$ | -59.4   |
| type B1           | transient           | type C              | -0.0005      | $8.8 \times 10^{-6}$ | -53.9   |
| type B2           | type B1             | resident            | 0.0011       | $9.8 \times 10^{-6}$ | 109.5   |
| type B2           | type B1             | transient           | 0.0009       | $8.3 \times 10^{-6}$ | 104.7   |
| type B2           | type B1             | type C              | 0.0001       | $5.3 \times 10^{-6}$ | 21.4    |
| type B2           | resident            | transient           | 0.0194       | $3.4 \times 10^{-5}$ | 572.4   |
| type B2           | resident            | type C              | 0.0012       | $1.0 \times 10^{-5}$ | 114.6   |
| type B2           | transient           | type C              | 0.0011       | $8.5 \times 10^{-6}$ | 130.1   |
| resident          | type B1             | type B2             | 0.0316       | $5.3 \times 10^{-5}$ | 598.9   |
| resident          | type B1             | transient           | 0.013        | $2.8 \times 10^{-5}$ | 460.3   |
| resident          | type B1             | type C              | 0.0305       | $5.3 \times 10^{-5}$ | 573.4   |
| resident          | type B2             | transient           | 0.0132       | $2.9 \times 10^{-5}$ | 461     |
| resident          | type B2             | type C              | 0.0315       | $5.5 \times 10^{-5}$ | 576.5   |
| resident          | transient           | type C              | 0.0132       | $2.9 \times 10^{-5}$ | 452.1   |
| transient         | type B1             | type B2             | 0.0181       | $3.1 \times 10^{-5}$ | 583.3   |
| transient         | type B1             | resident            | -0.0002      | $1.3 \times 10^{-5}$ | -13.7   |
| transient         | type B1             | type C              | 0.0171       | $3.1 \times 10^{-5}$ | 552.6   |
| transient         | type B2             | resident            | -0.0004      | $1.3 \times 10^{-5}$ | -29.5   |
| transient         | type B2             | type C              | 0.0179       | $3.2 \times 10^{-5}$ | 557     |
| transient         | resident            | type C              | -0.0003      | $1.3 \times 10^{-5}$ | -25.3   |
| type C            | type B1             | type B2             | 0.0013       | $6.7 \times 10^{-6}$ | 193.7   |
| type C            | type B1             | resident            | 0.0012       | $1.2 \times 10^{-5}$ | 104.3   |
| type C            | type B1             | transient           | 0.0011       | $9.5 \times 10^{-6}$ | 111     |
| type C            | type B2             | resident            | 0.0003       | $1.0 \times 10^{-5}$ | 24.2    |
| type C            | type B2             | transient           | 0.0003       | $8.6 \times 10^{-6}$ | 35.8    |
| type C            | resident            | transient           | 0.0185       | $3.6 \times 10^{-5}$ | 517.6   |



**Supplementary Table 5.** Summary results for the three-population test of the form  $f_3(A;B,C)$  which include comparison with the high coverage Atlantic genome. A significantly negative value of the  $f_3$  statistic implies that population A is admixed<sup>26</sup>.

| Target population | Source population 1 | Source population 2 | $f_3$ statistic | SE (f-statistic)      | Z-score |
|-------------------|---------------------|---------------------|-----------------|-----------------------|---------|
| Atlantic          | resident            | type B1             | 0.074           | 0.0011                | 67.0    |
| Atlantic          | resident            | type B2             | 0.074           | 0.0011                | 67.1    |
| Atlantic          | resident            | type C              | 0.074           | 0.0011                | 67.1    |
| Atlantic          | resident            | transient           | 0.069           | 0.0010                | 64.9    |
| Atlantic          | type B1             | type B2             | 0.084           | 0.0012                | 71.3    |
| Atlantic          | type B1             | type C              | 0.085           | 0.0012                | 71.2    |
| Atlantic          | type B1             | transient           | 0.074           | 0.0011                | 67.5    |
| Atlantic          | type B2             | type C              | 0.084           | 0.0012                | 71.2    |
| Atlantic          | type B2             | transient           | 0.074           | 0.0011                | 67.5    |
| Atlantic          | type C              | transient           | 0.074           | 0.0011                | 67.5    |
| resident          | Atlantic            | type B1             | -0.0022         | $9.4 \times 10^{-5}$  | -23.3   |
| resident          | Atlantic            | type B2             | -0.0022         | $9.2 \times 10^{-5}$  | -24.0   |
| resident          | Atlantic            | type C              | -0.0021         | $9.2 \times 10^{-5}$  | -22.5   |
| resident          | Atlantic            | transient           | -0.0031         | $8.7 \times 10^{-5}$  | 34.8    |
| type B1           | Atlantic            | resident            | 0.0079          | 0.0001                | 54.4    |
| type B1           | Atlantic            | type B2             | -0.0027         | $4.34 \times 10^{-5}$ | -63.21  |
| type B1           | Atlantic            | type C              | -0.0024         | $4.78 \times 10^{-5}$ | -50.75  |
| type B1           | Atlantic            | transient           | 0.0075          | 0.0001                | 57.1    |
| type B2           | Atlantic            | type B1             | -0.0016         | $4.11 \times 10^{-5}$ | -38.6   |
| type B2           | Atlantic            | type C              | -0.0013         | $4.10 \times 10^{-5}$ | -30.7   |
| type B2           | Atlantic            | transient           | 0.0086          | 0.0001                | 70.4    |
| type B2           | Atlantic            | resident            | 0.0091          | 0.0001                | 66.0    |
| type C            | Atlantic            | type B1             | -0.0015         | $4.58 \times 10^{-5}$ | -33.5   |
| type C            | Atlantic            | type B2             | -0.0014         | $2.20 \times 10^{-5}$ | -63.4   |
| type C            | Atlantic            | transient           | 0.0085          | 0.0001                | 68.0    |
| type C            | Atlantic            | resident            | 0.0089          | 0.0001                | 64.3    |
| transient         | Atlantic            | type B1             | -0.0075         | $7.42 \times 10^{-5}$ | -101.6  |
| transient         | Atlantic            | type B2             | -0.0075         | $7.26 \times 10^{-5}$ | -103.9  |
| transient         | Atlantic            | type C              | -0.0074         | $7.38 \times 10^{-5}$ | -100.4  |
| transient         | Atlantic            | resident            | -0.0019         | $6.94 \times 10^{-5}$ | -26.9   |

**Supplementary Table 6.** Top 20 significantly enriched GO: terms based on the top 1% *Fst* outliers in pairwise comparisons of Antarctic ecotypes with Pacific ecotypes.

| GO.ID | Term                                                                     | Annotated | Significant | Expected | P-value (classic Fisher) |
|-------|--------------------------------------------------------------------------|-----------|-------------|----------|--------------------------|
| 1     | GO:0060612 adipose tissue development                                    | 6         | 2           | 0.06     | 0.0015                   |
| 2     | GO:0030001 metal ion transport                                           | 499       | 13          | 5        | 0.0015                   |
| 3     | GO:0006811 ion transport                                                 | 931       | 19          | 9.33     | 0.0023                   |
| 4     | GO:0060134 prepulse inhibition                                           | 8         | 2           | 0.08     | 0.0027                   |
| 5     | GO:0006812 cation transport                                              | 613       | 14          | 6.14     | 0.0033                   |
| 6     | GO:0032026 response to magnesium ion                                     | 10        | 2           | 0.1      | 0.0043                   |
| 7     | GO:0006817 phosphate ion transport                                       | 11        | 2           | 0.11     | 0.0052                   |
| 8     | GO:0001824 blastocyst development                                        | 37        | 3           | 0.37     | 0.006                    |
| 9     | GO:0055085 transmembrane transport                                       | 658       | 14          | 6.59     | 0.0061                   |
| 10    | GO:0031424 keratinization                                                | 12        | 2           | 0.12     | 0.0062                   |
| 11    | GO:0045444 fat cell differentiation                                      | 76        | 4           | 0.76     | 0.0071                   |
| 12    | GO:0001964 startle response                                              | 14        | 2           | 0.14     | 0.0084                   |
| 13    | GO:0032413 negative regulation of ion transmembrane transporter activity | 14        | 2           | 0.14     | 0.0084                   |
| 14    | GO:0006814 sodium ion transport                                          | 126       | 5           | 1.26     | 0.0087                   |
| 15    | GO:0016925 protein sumoylation                                           | 15        | 2           | 0.15     | 0.0096                   |
| 16    | GO:0001835 blastocyst hatching                                           | 1         | 1           | 0.01     | 0.01                     |
| 17    | GO:0003215 cardiac right ventricle morphogenesis                         | 1         | 1           | 0.01     | 0.01                     |
| 18    | GO:0003284 septum primum development                                     | 1         | 1           | 0.01     | 0.01                     |
| 19    | GO:0003289 atrial septum primum morphogenesis                            | 1         | 1           | 0.01     | 0.01                     |
| 20    | GO:0007161 calcium-independent cell-matrix adhesion                      | 1         | 1           | 0.01     | 0.01                     |

**Supplementary Table 7.** Top 20 GO-terms of biological processes enriched in the top 99.9 (resident, transient and Antarctic branches) and top 99.99 percentile (type B1, type B2 and type C).

| GO ID          | Term                                                                        | Annotated | Significant | Expected | P-value (classic Fisher) |         |
|----------------|-----------------------------------------------------------------------------|-----------|-------------|----------|--------------------------|---------|
| <b>type B1</b> |                                                                             |           |             |          |                          |         |
| 1 GO:0051571   | positive regulation of histone H3-K4 methylation                            | 2         | 1           | 0        | 0.0013                   |         |
| 2 GO:0010216   | maintenance of DNA methylation                                              | 3         | 1           | 0        | 0.0019                   |         |
| 3 GO:0051573   | negative regulation of histone H3-K9 methylation                            | 3         | 1           | 0        | 0.0019                   |         |
| 4 GO:0001880   | Mullerian duct regression                                                   | 4         | 1           | 0        | 0.0025                   |         |
| 5 GO:0031062   | positive regulation of histone methylation                                  | 4         | 1           | 0        | 0.0025                   |         |
| 6 GO:0050913   | sensory perception of bitter taste                                          | 4         | 1           | 0        | 0.0025                   |         |
| 7 GO:0050916   | sensory perception of sweet taste                                           | 4         | 1           | 0        | 0.0025                   |         |
| 8 GO:0051569   | regulation of histone H3-K4 methylation                                     | 4         | 1           | 0        | 0.0025                   |         |
| 9 GO:0051570   | regulation of histone H3-K9 methylation                                     | 4         | 1           | 0        | 0.0025                   |         |
| 10 GO:0006730  | one-carbon metabolic process                                                | 127       | 2           | 0.08     | 0.0027                   |         |
| 11 GO:0031061  | negative regulation of histone methylation                                  | 5         | 1           | 0        | 0.0032                   |         |
| 12 GO:0050917  | sensory perception of umami taste                                           | 5         | 1           | 0        | 0.0032                   |         |
| 13 GO:0051567  | histone H3-K9 methylation                                                   | 6         | 1           | 0        | 0.0038                   |         |
| 14 GO:0060033  | anatomical structure regression                                             | 6         | 1           | 0        | 0.0038                   |         |
| 15 GO:0061647  | histone H3-K9 modification                                                  | 6         | 1           | 0        | 0.0038                   |         |
| 16 GO:0031060  | regulation of histone methylation                                           | 7         | 1           | 0        | 0.0044                   |         |
| 17 GO:0031057  | negative regulation of histone modification                                 | 10        | 1           | 0.01     | 0.0063                   |         |
| 18 GO:0045123  | cellular extravasation                                                      | 10        | 1           | 0.01     | 0.0063                   |         |
| 19 GO:0051568  | histone H3-K4 methylation                                                   | 11        | 1           | 0.01     | 0.0070                   |         |
| 20 GO:0031058  | positive regulation of histone modification                                 | 13        | 1           | 0.01     | 0.0082                   |         |
| <b>type B2</b> |                                                                             |           |             |          |                          |         |
| 1 GO:0002115   | store-operated calcium entry                                                | 2         | 1           | 0        | 0.0013                   |         |
| 2 GO:0032237   | activation of store-operated calcium channel activity                       | 4         | 1           | 0        | 0.0025                   |         |
| 3 GO:1901339   | regulation of store-operated calcium channel activity                       | 4         | 1           | 0        | 0.0025                   |         |
| 4 GO:1901341   | positive regulation of store-operated calcium channel activity              | 4         | 1           | 0        | 0.0025                   |         |
| 5 GO:0007185   | transmembrane receptor protein tyrosine phosphatase signaling pathway       | 7         | 1           | 0        | 0.0044                   |         |
| 6 GO:1901021   | positive regulation of calcium ion transmembrane transporter activity       | 7         | 1           | 0        | 0.0044                   |         |
| 7 GO:2001259   | positive regulation of cation channel activity                              | 7         | 1           | 0        | 0.0044                   |         |
| 8 GO:0035023   | regulation of Rho protein signal transduction                               | 189       | 2           | 0.12     | 0.0059                   |         |
| 9 GO:0046578   | regulation of Ras protein signal transduction                               | 222       | 2           | 0.14     | 0.0081                   |         |
| 10 GO:0032414  | positive regulation of ion transmembrane transporter activity               | 13        | 1           | 0.01     | 0.0082                   |         |
| 11 GO:0007266  | Rho protein signal transduction                                             | 227       | 2           | 0.14     | 0.0085                   |         |
| 12 GO:1901019  | regulation of calcium ion transmembrane transporter activity                | 14        | 1           | 0.01     | 0.0089                   |         |
| 13 GO:1903169  | regulation of calcium ion transmembrane transport                           | 14        | 1           | 0.01     | 0.0089                   |         |
| 14 GO:2001257  | regulation of cation channel activity                                       | 14        | 1           | 0.01     | 0.0089                   |         |
| 15 GO:0032411  | positive regulation of transporter activity                                 | 15        | 1           | 0.01     | 0.0095                   |         |
| 16 GO:0034767  | positive regulation of ion transmembrane transport                          | 15        | 1           | 0.01     | 0.0095                   |         |
| 17 GO:0051056  | regulation of small GTPase mediated signal transduction                     | 257       | 2           | 2        | 0.0107                   |         |
| 18 GO:0070588  | calcium ion transmembrane transport                                         | 17        | 1           | 0.01     | 0.0108                   |         |
| 19 GO:0046928  | regulation of neurotransmitter secretion                                    | 19        | 1           | 0.01     | 0.0120                   |         |
| 20 GO:0030574  | collagen catabolic process                                                  | 20        | 1           | 0.01     | 0.0127                   |         |
| <b>type C</b>  |                                                                             |           |             |          |                          |         |
| 1 GO:0034124   | regulation of MyD88-dependent toll-like receptor signaling pathway          |           | 1           | 1        | 0                        | 0.00056 |
| 2 GO:0034126   | positive regulation of MyD88-dependent toll-like receptor signaling pathway |           | 1           | 1        | 0                        | 0.00056 |
| 3 GO:0002253   | activation of immune response                                               |           | 111         | 2        | 0.06                     | 0.00158 |
| 4 GO:0010842   | retina layer formation                                                      |           | 3           | 1        | 0                        | 0.00167 |
| 5 GO:0002755   | MyD88-dependent toll-like receptor signaling pathway                        |           | 6           | 1        | 0                        | 0.00334 |
| 6 GO:0050778   | positive regulation of immune response                                      |           | 177         | 2        | 0.1                      | 0.00395 |
| 7 GO:0034123   | positive regulation of toll-like receptor signaling pathway                 |           | 8           | 1        | 0                        | 0.00445 |
| 8 GO:0045087   | innate immune response                                                      |           | 195         | 2        | 0.11                     | 0.00477 |
| 9 GO:0003407   | neural retina development                                                   |           | 10          | 1        | 0.01                     | 0.00556 |
| 10 GO:0045123  | cellular extravasation                                                      |           | 10          | 1        | 0.01                     | 0.00556 |
| 11 GO:0050776  | regulation of immune response                                               |           | 214         | 2        | 0.12                     | 0.00572 |
| 12 GO:0034121  | regulation of toll-like receptor signaling pathway                          |           | 11          | 1        | 0.01                     | 0.00611 |
| 13 GO:0006957  | complement activation, alternative pathway                                  |           | 12          | 1        | 0.01                     | 0.00666 |
| 14 GO:0001937  | negative regulation of endothelial cell proliferation                       |           | 15          | 1        | 0.01                     | 0.00832 |
| 15 GO:0031290  | retinal ganglion cell axon guidance                                         |           | 15          | 1        | 0.01                     | 0.00832 |
| 16 GO:0006935  | chemotaxis                                                                  |           | 266         | 2        | 0.15                     | 0.00873 |
| 17 GO:0042330  | taxis                                                                       |           | 266         | 2        | 0.15                     | 0.00873 |
| 18 GO:0050798  | activated T cell proliferation                                              |           | 16          | 1        | 0.01                     | 0.00888 |
| 19 GO:0010596  | negative regulation of endothelial cell migration                           |           | 17          | 1        | 0.01                     | 0.00943 |
| 20 GO:0007155  | cell adhesion                                                               |           | 875         | 3        | 0.49                     | 0.00951 |

| <b>Branch to shared ancestor of Antarctic types</b> |            |                                                                                                  |     |   |      |        |
|-----------------------------------------------------|------------|--------------------------------------------------------------------------------------------------|-----|---|------|--------|
| 1                                                   | GO:0060211 | regulation of nuclear-transcribed mRNA poly(A) tail shortening                                   | 1   | 1 | 0.01 | 0.0052 |
| 2                                                   | GO:0060213 | positive regulation of nuclear-transcribed mRNA poly(A) tail shortening                          | 1   | 1 | 0.01 | 0.0052 |
| 3                                                   | GO:0061013 | regulation of mRNA catabolic process                                                             | 1   | 1 | 0.01 | 0.0052 |
| 4                                                   | GO:0061014 | positive regulation of mRNA catabolic process                                                    | 1   | 1 | 0.01 | 0.0052 |
| 5                                                   | GO:1900151 | regulation of nuclear-transcribed mRNA catabolic process, deadenylation-dependent decay          | 1   | 1 | 0.01 | 0.0052 |
| 6                                                   | GO:1900153 | positive regulation of nuclear-transcribed mRNA catabolic process, deadenylation-dependent decay | 1   | 1 | 0.01 | 0.0052 |
| 7                                                   | GO:0000289 | nuclear-transcribed mRNA poly(A) tail shortening                                                 | 2   | 1 | 0.01 | 0.0105 |
| 8                                                   | GO:0006196 | AMP catabolic process                                                                            | 2   | 1 | 0.01 | 0.0105 |
| 9                                                   | GO:0015682 | ferric iron transport                                                                            | 2   | 1 | 0.01 | 0.0105 |
| 10                                                  | GO:0030327 | prenylated protein catabolic process                                                             | 2   | 1 | 0.01 | 0.0105 |
| 11                                                  | GO:0030328 | prenylcysteine catabolic process                                                                 | 2   | 1 | 0.01 | 0.0105 |
| 12                                                  | GO:0030329 | prenylcysteine metabolic process                                                                 | 2   | 1 | 0.01 | 0.0105 |
| 13                                                  | GO:0033572 | transferrin transport                                                                            | 2   | 1 | 0.01 | 0.0105 |
| 14                                                  | GO:0050779 | RNA destabilization                                                                              | 2   | 1 | 0.01 | 0.0105 |
| 15                                                  | GO:0072512 | trivalent inorganic cation transport                                                             | 2   | 1 | 0.01 | 0.0105 |
| 16                                                  | GO:0006091 | generation of precursor metabolites and energy                                                   | 276 | 5 | 1.45 | 0.0148 |
| 17                                                  | GO:0009128 | purine nucleoside monophosphate catabolic process                                                | 3   | 1 | 0.02 | 0.0157 |
| 18                                                  | GO:0009158 | ribonucleoside monophosphate catabolic process                                                   | 3   | 1 | 0.02 | 0.0157 |
| 19                                                  | GO:0009169 | purine ribonucleoside monophosphate catabolic process                                            | 3   | 1 | 0.02 | 0.0157 |
| 20                                                  | GO:0030033 | purine ribonucleoside monophosphate catabolic process                                            | 3   | 1 | 0.02 | 0.0157 |

#### resident

|    |            |                                                                                            |     |   |      |        |
|----|------------|--------------------------------------------------------------------------------------------|-----|---|------|--------|
| 1  | GO:0060562 | epithelial tube morphogenesis                                                              | 166 | 4 | 0.5  | 0.0015 |
| 2  | GO:0035239 | tube morphogenesis                                                                         | 180 | 4 | 0.54 | 0.0021 |
| 3  | GO:0048546 | digestive tract morphogenesis                                                              | 23  | 2 | 0.07 | 0.0022 |
| 4  | GO:0001702 | gastrulation with mouth forming second                                                     | 24  | 2 | 0.07 | 0.0024 |
| 5  | GO:0003215 | cardiac right ventricle morphogenesis                                                      | 1   | 1 | 0    | 0.0030 |
| 6  | GO:0003284 | septum primum development                                                                  | 1   | 1 | 0    | 0.0030 |
| 7  | GO:0003289 | atrial septum primum morphogenesis                                                         | 1   | 1 | 0    | 0.0030 |
| 8  | GO:0007443 | Malpighian tubule morphogenesis                                                            | 1   | 1 | 0    | 0.0030 |
| 9  | GO:0032793 | positive regulation of CREB transcription factor activity                                  | 1   | 1 | 0    | 0.0030 |
| 10 | GO:0071372 | cellular response to follicle-stimulating hormone stimulus                                 | 1   | 1 | 0    | 0.0030 |
| 11 | GO:0072002 | Malpighian tubule development                                                              | 1   | 1 | 0    | 0.0030 |
| 12 | GO:2000055 | positive regulation of Wnt signaling pathway involved in dorsal/ventral axis specification | 1   | 1 | 0    | 0.0030 |
| 13 | GO:0001947 | heart looping                                                                              | 33  | 2 | 0.1  | 0.0044 |
| 14 | GO:0003143 | embryonic heart tube morphogenesis                                                         | 33  | 2 | 0.1  | 0.0044 |
| 15 | GO:0061371 | determination of heart left/right asymmetry                                                | 33  | 2 | 0.1  | 0.0044 |
| 16 | GO:0048863 | stem cell differentiation                                                                  | 118 | 3 | 0.36 | 0.0054 |
| 17 | GO:0003283 | atrial septum development                                                                  | 2   | 1 | 0.01 | 0.006  |
| 18 | GO:0003344 | pericardium morphogenesis                                                                  | 2   | 1 | 0.01 | 0.006  |
| 19 | GO:0035021 | negative regulation of Rac protein signal transduction                                     | 2   | 1 | 0.01 | 0.006  |
| 20 | GO:0036315 | cellular response to sterol                                                                | 2   | 1 | 0.01 | 0.006  |

#### transient

|    |            |                                                                   |      |    |      |         |
|----|------------|-------------------------------------------------------------------|------|----|------|---------|
| 1  | GO:0060056 | mammary gland involution                                          | 7    | 2  | 0.04 | 0.0007  |
| 2  | GO:0044248 | cellular catabolic process                                        | 1039 | 15 | 6.11 | 0.00091 |
| 3  | GO:0044712 | single-organism catabolic process                                 | 629  | 11 | 3.7  | 0.00106 |
| 4  | GO:0040036 | regulation of fibroblast growth factor receptor signaling pathway | 13   | 2  | 0.08 | 0.00256 |
| 5  | GO:0045648 | positive regulation of erythrocyte differentiation                | 13   | 2  | 0.08 | 0.00256 |
| 6  | GO:0009056 | catabolic process                                                 | 1199 | 15 | 7.06 | 0.00375 |
| 7  | GO:1901575 | organic substance catabolic process                               | 1107 | 14 | 6.51 | 0.0047  |
| 8  | GO:0030218 | erythrocyte differentiation                                       | 62   | 3  | 0.36 | 0.00577 |
| 9  | GO:0000379 | tRNA-type intron splice site recognition and cleavage             | 1    | 1  | 0.01 | 0.00589 |
| 10 | GO:0006535 | cysteine biosynthetic process from serine                         | 1    | 1  | 0.01 | 0.00589 |
| 11 | GO:0007079 | mitotic chromosome movement towards spindle pole                  | 1    | 1  | 0.01 | 0.00589 |
| 12 | GO:0009757 | hexose mediated signaling                                         | 1    | 1  | 0.01 | 0.00589 |
| 13 | GO:0010182 | sugar mediated signaling pathway                                  | 1    | 1  | 0.01 | 0.00589 |
| 14 | GO:0010255 | glucose mediated signaling pathway                                | 1    | 1  | 0.01 | 0.00589 |
| 15 | GO:0019343 | cysteine biosynthetic process via cystathionine                   | 1    | 1  | 0.01 | 0.00589 |
| 16 | GO:0033690 | positive regulation of osteoblast proliferation                   | 1    | 1  | 0.01 | 0.00589 |
| 17 | GO:0042636 | negative regulation of hair cycle                                 | 1    | 1  | 0.01 | 0.00589 |
| 18 | GO:0043418 | homocysteine catabolic process                                    | 1    | 1  | 0.01 | 0.00589 |
| 19 | GO:0045978 | negative regulation of nucleoside metabolic process               | 1    | 1  | 0.01 | 0.00589 |
| 20 | GO:0051799 | negative regulation of hair follicle development                  | 1    | 1  | 0.01 | 0.00589 |

**Supplementary Table 8.** Top 20 GO-terms of biological processes enriched in the top 99.9 (resident, transient and Antarctic branches) and top 99.99 percentile (type B1, type B2 and type C).

| GO ID          | Term                                                                                                | Annotated | Significant | Expected | P-value<br>(Classic<br>Fisher) |
|----------------|-----------------------------------------------------------------------------------------------------|-----------|-------------|----------|--------------------------------|
| <b>type B1</b> |                                                                                                     |           |             |          |                                |
| 1              | GO:000822 inositol hexakisphosphate binding                                                         | 1         | 1           | 0        | 0.00059                        |
| 2              | GO:0070679 inositol 1,4,5 trisphosphate binding                                                     | 2         | 1           | 0        | 0.00118                        |
| 3              | GO:0005220 inositol 1,4,5-trisphosphate-sensitive calcium-release channel activity                  | 3         | 1           | 0        | 0.00177                        |
| 4              | GO:0043533 inositol 1,3,4,5 tetrakisphosphate binding                                               | 3         | 1           | 0        | 0.00177                        |
| 5              | GO:0005057 receptor signaling protein activity                                                      | 124       | 2           | 0.07     | 0.00224                        |
| 6              | GO:0003886 DNA (cytosine-5-)-methyltransferase activity                                             | 4         | 1           | 0        | 0.00236                        |
| 7              | GO:0008157 protein phosphatase 1 binding                                                            | 4         | 1           | 0        | 0.00236                        |
| 8              | GO:0009008 DNA-methyltransferase activity                                                           | 5         | 1           | 0        | 0.00295                        |
| 9              | GO:0030618 transforming growth factor beta receptor, pathway-specific cytoplasmic mediator activity | 5         | 1           | 0        | 0.00295                        |
| 10             | GO:0008168 methyltransferase activity                                                               | 164       | 2           | 0.1      | 0.00389                        |
| 11             | GO:0016741 transferase activity, transferring one-carbon groups                                     | 171       | 2           | 0.1      | 0.00422                        |
| 12             | GO:0015278 calcium-release channel activity                                                         | 8         | 1           | 0        | 0.00472                        |
| 13             | GO:0032395 MHC class II receptor activity                                                           | 9         | 1           | 0.01     | 0.0053                         |
| 14             | GO:0005072 transforming growth factor beta receptor, cytoplasmic mediator activity                  | 10        | 1           | 0.01     | 0.00589                        |
| 15             | GO:0005217 intracellular ligand-gated ion channel activity                                          | 14        | 1           | 0.01     | 0.00824                        |
| 16             | GO:0004089 carbonate dehydratase activity                                                           | 15        | 1           | 0.01     | 0.00883                        |
| 17             | GO:0004871 signal transducer activity                                                               | 1726      | 4           | 1.02     | 0.01201                        |
| 18             | GO:0060089 molecular transducer activity                                                            | 1726      | 4           | 1.02     | 0.01201                        |
| 19             | GO:0004864 protein phosphatase inhibitor activity                                                   | 22        | 1           | 0.01     | 0.01                           |
| 20             | GO:0019212 phosphatase inhibitor activity                                                           | 24        | 1           | 0.01     | 0.01                           |
| <b>type B2</b> |                                                                                                     |           |             |          |                                |
| 1              | GO:0005089 Rho guanyl-nucleotide exchange factor activity                                           | 69        | 2           | 0.05     | 0.009                          |
| 2              | GO:0005088 Ras guanyl-nucleotide exchange factor activity                                           | 83        | 2           | 0.06     | 0.0013                         |
| 3              | GO:0017089 glycolipid transporter activity                                                          | 4         | 1           | 0        | 0.0027                         |
| 4              | GO:0005085 guanyl-nucleotide exchange factor activity                                               | 144       | 2           | 0.1      | 0.0038                         |
| 5              | GO:0050998 nitric-oxide synthase binding                                                            | 6         | 1           | 0        | 0.0040                         |
| 6              | GO:0019894 kinesin binding                                                                          | 12        | 1           | 0.01     | 0.0079                         |
| 7              | GO:0051861 glycolipid binding                                                                       | 15        | 1           | 0.01     | 0.0099                         |
| 8              | GO:0019905 syntaxin binding                                                                         | 25        | 1           | 0.02     | 0.0165                         |
| 9              | GO:1901505 carbohydrate derivative transporter activity                                             | 27        | 1           | 0.02     | 0.0178                         |
| 10             | GO:0000149 SNARE binding                                                                            | 31        | 1           | 0.02     | 0.0204                         |
| 11             | GO:0030695 GTPase regulator activity                                                                | 393       | 2           | 0.26     | 0.0264                         |
| 12             | GO:0060589 nucleoside-triphosphatase regulator activity                                             | 401       | 2           | 0.27     | 0.0274                         |
| 13             | GO:0008092 cytoskeletal protein binding                                                             | 495       | 2           | 0.33     | 0.0405                         |
| 14             | GO:0005200 structural constituent of cytoskeleton                                                   | 65        | 1           | 0.04     | 0.0424                         |
| 15             | GO:0005319 lipid transporter activity                                                               | 70        | 1           | 0.05     | 0.0456                         |
| 16             | GO:0005509 calcium ion binding                                                                      | 562       | 2           | 0.37     | 0.051                          |
| 17             | GO:0004222 metalloendopeptidase activity                                                            | 97        | 1           | 0.06     | 0.0626                         |
| 18             | GO:0030234 enzyme regulator activity                                                                | 792       | 2           | 0.53     | 0.0935                         |
| 19             | GO:0098772 molecular function regulator                                                             | 855       | 2           | 0.57     | 0.1066                         |
| 20             | GO:0019901 protein kinase binding                                                                   | 169       | 1           | 0.11     | 0.1069                         |
| <b>type C</b>  |                                                                                                     |           |             |          |                                |
| 1              | GO:0001846 opsonin binding                                                                          | 7         | 1           | 0        | 0.0031                         |
| 2              | GO:0019841 retinol binding                                                                          | 10        | 1           | 0        | 0.0044                         |
| 3              | GO:0043395 heparan sulfate proteoglycan binding                                                     | 11        | 1           | 0        | 0.0049                         |
| 4              | GO:0043014 alpha-tubulin binding                                                                    | 12        | 1           | 0.01     | 0.0053                         |
| 5              | GO:0043394 proteoglycan binding                                                                     | 15        | 1           | 0.01     | 0.0066                         |
| 6              | GO:0005001 transmembrane receptor protein tyrosine                                                  | 16        | 1           | 0.01     | 0.0071                         |
| 7              | GO:0019198 transmembrane receptor protein phosphatase activity                                      | 16        | 1           | 0.01     | 0.0071                         |
| 8              | GO:0045296 cadherin binding                                                                         | 20        | 1           | 0.01     | 0.0088                         |
| 9              | GO:0005501 retinoid binding                                                                         | 24        | 1           | 0.01     | 0.0106                         |
| 10             | GO:0019840 isoprenoid binding                                                                       | 26        | 1           | 0.01     | 0.0115                         |
| 11             | GO:0017137 Rab GTPase binding                                                                       | 33        | 1           | 0.01     | 0.0145                         |
| 12             | GO:0001948 glycoprotein binding                                                                     | 43        | 1           | 0.02     | 0.0189                         |
| 13             | GO:0043178 alcohol binding                                                                          | 65        | 1           | 0.03     | 0.0284                         |
| 14             | GO:0017016 Ras GTPase binding                                                                       | 84        | 1           | 0.04     | 0.0366                         |
| 15             | GO:0031267 small GTPase binding                                                                     | 93        | 1           | 0.04     | 0.0405                         |
| 16             | GO:0050839 cell adhesion molecule binding                                                           | 94        | 1           | 0.04     | 0.0409                         |
| 17             | GO:0004725 protein tyrosine phosphatase activity                                                    | 95        | 1           | 0.04     | 0.0413                         |
| 18             | GO:0004222 metalloendopeptidase activity                                                            | 97        | 1           | 0.04     | 0.0422                         |
| 19             | GO:0015631 tubulin binding                                                                          | 98        | 1           | 0.04     | 0.0426                         |
| 20             | GO:0051020 GTPase binding                                                                           | 106       | 1           | 0.05     | 0.0460                         |

| GO ID            | Term                                                                     | Annotated | Significant | Expected | P-value<br>(Classic<br>Fisher) |
|------------------|--------------------------------------------------------------------------|-----------|-------------|----------|--------------------------------|
| <b>Antarctic</b> |                                                                          |           |             |          |                                |
| 1                | GO:0001735 prenylcysteine oxidase activity                               | 1         | 1           | 0.01     | 0.0057                         |
| 2                | GO:0008555 chloride-transporting ATPase activity                         | 1         | 1           | 0.01     | 0.0057                         |
| 3                | GO:0030215 semaphorin receptor binding                                   | 1         | 1           | 0.01     | 0.0057                         |
| 4                | GO:0051990 (R)-2-hydroxyglutarate dehydrogenase activity                 | 1         | 1           | 0.01     | 0.0057                         |
| 5                | GO:0004605 phosphatidate cytidylyltransferase activity                   | 2         | 1           | 0.01     | 0.0113                         |
| 6                | GO:0003876 AMP deaminase activity                                        | 3         | 1           | 0.02     | 0.0170                         |
| 7                | GO:0004332 fructose-bisphosphate aldolase activity                       | 3         | 1           | 0.02     | 0.0170                         |
| 8                | GO:0004339 glucan "1,4-alpha-glucosidase" activity                       | 3         | 1           | 0.02     | 0.0170                         |
| 9                | GO:0005250 A-type (transient outward) potassium channel activity         | 3         | 1           | 0.02     | 0.0170                         |
| 10               | GO:0008384 IkappaB kinase activity                                       | 3         | 1           | 0.02     | 0.0170                         |
| 11               | GO:0016149 translation release factor activity, codon specific           | 3         | 1           | 0.02     | 0.0170                         |
| 12               | GO:0047623 adenosine-phosphate deaminase activity                        | 3         | 1           | 0.02     | 0.0170                         |
| 13               | GO:0003696 satellite DNA binding                                         | 4         | 1           | 0.02     | 0.0225                         |
| 14               | GO:0004689 phosphorylase kinase activity                                 | 4         | 1           | 0.02     | 0.0225                         |
| 15               | GO:0008853 exodeoxyribonuclease III activity                             | 4         | 1           | 0.02     | 0.0225                         |
| 16               | GO:0019237 centromeric DNA binding                                       | 4         | 1           | 0.02     | 0.0225                         |
| 17               | GO:0004396 hexokinase activity                                           | 5         | 1           | 0.03     | 0.0281                         |
| 18               | GO:0003747 translation release factor activity                           | 6         | 1           | 0.03     | 0.0336                         |
| 19               | GO:0004704 NF-kappaB-inducing kinase activity                            | 6         | 1           | 0.03     | 0.0336                         |
| 20               | GO:0008079 translation termination factor activity                       | 6         | 1           | 0.03     | 0.0336                         |
| <b>resident</b>  |                                                                          |           |             |          |                                |
| 1                | GO:0052689 carboxylic ester hydrolase activity                           | 65        | 3           | 0.2      | 0.00099                        |
| 2                | GO:0004623 phospholipase A2 activity                                     | 24        | 2           | 0.07     | 0.00236                        |
| 3                | GO:0016298 lipase activity                                               | 89        | 3           | 0.27     | 0.00244                        |
| 4                | GO:0004757 sepiapterin reductase activity                                | 1         | 1           | 0        | 0.00303                        |
| 5                | GO:0015633 zinc transporting ATPase activity                             | 1         | 1           | 0        | 0.00303                        |
| 6                | GO:0031492 nucleosomal DNA binding                                       | 1         | 1           | 0        | 0.00303                        |
| 7                | GO:0030984 kininogen binding                                             | 2         | 1           | 0.01     | 0.00604                        |
| 8                | GO:0003774 motor activity                                                | 131       | 3           | 0.04     | 0.0072                         |
| 9                | GO:0038024 cargo receptor activity                                       | 56        | 2           | 0.17     | 0.01241                        |
| 10               | GO:0005087 Ran guanyl-nucleotide exchange factor activity                | 5         | 1           | 0.02     | 0.01504                        |
| 11               | GO:0015321 sodium-dependent phosphate transmembrane transporter activity | 5         | 1           | 0.02     | 0.01504                        |
| 12               | GO:0004197 cysteine-type endopeptidase activity                          | 68        | 2           | 0.21     | 0.01795                        |
| 13               | GO:0031491 nucleosome binding                                            | 6         | 1           | 0.02     | 0.01802                        |
| 14               | GO:0004033 aldo-keto reductase (NADP) activity                           | 7         | 1           | 0.02     | 0.02100                        |
| 15               | GO:0047498 calcium-dependent phospholipase A2 activity                   | 7         | 1           | 0.02     | 0.02100                        |
| 16               | GO:0004620 phospholipase activity                                        | 76        | 2           | 0.23     | 0.02211                        |
| 17               | GO:0003810 protein-glutamine gamma-glutamyltransferase activity          | 8         | 1           | 0.02     | 0.02396                        |
| 18               | GO:0005088 Ras guanyl-nucleotide exchange factor activity                | 83        | 2           | 0.25     | 0.02606                        |
| 19               | GO:0032395 MHC class II receptor activity                                | 9         | 1           | 0.03     | 0.02692                        |
| 20               | GO:0033613 activating transcription factor binding                       | 9         | 1           | 0.03     | 0.02692                        |
| <b>transient</b> |                                                                          |           |             |          |                                |
| 1                | GO:0003905 alkylbase DNA N-glycosylase activity                          | 1         | 1           | 0.01     | 0.0062                         |
| 2                | GO:0004122 cystathionine beta-synthase activity                          | 1         | 1           | 0.01     | 0.0062                         |
| 3                | GO:0004349 glutamate 5-kinase activity                                   | 1         | 1           | 0.01     | 0.0062                         |
| 4                | GO:0004350 glutamate-5-semialdehyde dehydrogenase activity               | 1         | 1           | 0.01     | 0.0062                         |
| 5                | GO:0008434 calcitriol receptor activity                                  | 1         | 1           | 0.01     | 0.0062                         |
| 6                | GO:0008470 isovaleryl-CoA dehydrogenase activity                         | 1         | 1           | 0.01     | 0.0062                         |
| 7                | GO:0015019 heparan-alpha-glucosaminide N-acetyltransferase activity      | 1         | 1           | 0.01     | 0.0062                         |
| 8                | GO:0019202 amino acid kinase activity                                    | 1         | 1           | 0.01     | 0.0062                         |
| 9                | GO:0035538 carbohydrate response element binding                         | 1         | 1           | 0.01     | 0.0062                         |
| 10               | GO:0042602 riboflavin reductase (NADPH) activity                         | 1         | 1           | 0.01     | 0.0062                         |
| 11               | GO:0046316 gluconokinase activity                                        | 1         | 1           | 0.01     | 0.0062                         |
| 12               | GO:0050197 phytanate-CoA ligase activity                                 | 1         | 1           | 0.01     | 0.0062                         |
| 13               | GO:0070251 pristanate-CoA ligase activity                                | 1         | 1           | 0.01     | 0.0062                         |
| 14               | GO:0070404 NADH binding                                                  | 1         | 1           | 0.01     | 0.0062                         |
| 15               | GO:0071164 RNA trimethylguanosine synthase activity                      | 1         | 1           | 0.01     | 0.0062                         |
| 16               | GO:0004872 receptor activity                                             | 1341      | 16          | 8.31     | 0.0076                         |
| 17               | GO:0001608 G-protein coupled nucleotide receptor activity                | 25        | 2           | 0.16     | 0.0104                         |
| 18               | GO:0045028 G-protein coupled purinergic nucleotide                       | 25        | 2           | 0.16     | 0.0104                         |
| 19               | GO:0000213 tRNA-intron endonuclease activity                             | 2         | 1           | 0.01     | 0.0124                         |
| 20               | GO:0002046 opsin binding                                                 | 2         | 1           | 0.01     | 0.0124                         |

**Supplementary Table 9.** Estimates of mean nucleotide diversity ( $\pi$ ).

|           | Sites covered in at least 5 individuals |                                  |                                  | Genome-wide means using scaffolds with at least 1,000 sites with sequencing coverage for all individuals |
|-----------|-----------------------------------------|----------------------------------|----------------------------------|----------------------------------------------------------------------------------------------------------|
|           | 50 Kb windows with 10 Kb slides         | 100 Kb windows with 10 Kb slides | 200 Kb windows with 50 Kb slides |                                                                                                          |
| transient | 0.0021                                  | 0.0021                           | 0.0021                           | 0.0029                                                                                                   |
| Resident  | 0.0014                                  | 0.0014                           | 0.0014                           | 0.0015                                                                                                   |
| type B1   | 0.0025                                  | 0.0025                           | 0.0025                           | 0.0028                                                                                                   |
| type B2   | 0.0028                                  | 0.0028                           | 0.0028                           | 0.0027                                                                                                   |
| type C    | 0.0011                                  | 0.0011                           | 0.0011                           | 0.0013                                                                                                   |

**Supplementary Table 10.** Lists of genes with associated with the top 0.1% (branches to the resident, transient and most recent common ancestor of the Antarctic types) and top 0.01% (branches leading to type B1, type B2 and type C) population branch statistic (PBS) values. *Note that some genes are listed twice due to different exons of the same gene being outliers*

| <i>type B1</i> | Gene                          |                | PBS   |
|----------------|-------------------------------|----------------|-------|
|                | refGene.NM_001130823.1.inc    | <i>DNMT1</i>   | 0.439 |
|                | refGene.NM_005905.1.inc       | <i>SMAD9</i>   | 0.420 |
|                | ensGene.ENST00000339092.1.inc | <i>AAK1</i>    | 0.401 |
|                | refGene.NM_002714.1           | <i>PPP1R10</i> | 0.390 |
|                | refGene.NM_019111.5.inc       | <i>HLA-DRA</i> | 0.389 |
|                | refGene.NM_001134665.1.inc    | <i>TRMT10A</i> | 0.377 |
|                | refGene.NM_001739.1.inc       | <i>CA5A</i>    | 0.375 |
|                | knownGene.uc003oey.2.1        | <i>ITPR3</i>   | 0.364 |
|                | refGene.NM_024600.1           | <i>TMEM204</i> | 0.353 |
|                | knownGene.uc003jow.2.1        | <i>NNT</i>     | 0.350 |

| <i>type B2</i> | Gene                                  |                | PBS   |
|----------------|---------------------------------------|----------------|-------|
|                | refGene.NM_001014985.1                | <i>GLTPD2</i>  | 0.374 |
|                | vegaGene.OTTHUMT00000359877.1.in<br>c | <i>WDR1</i>    | 0.340 |
|                | refGene.NM_178468.1.inc               | <i>FAM83C</i>  | 0.339 |
|                | refGene.NM_002421.1.inc               | <i>MMP1</i>    | 0.334 |
|                |                                       | <i>ARHGEF1</i> |       |
|                | refGene.NM_014786.1.inc               | 7              | 0.326 |
|                | refGene.NM_181654.1                   | <i>CPLX4</i>   | 0.315 |
|                | ensGene.ENST00000425660.1.inc         | <i>ACTB</i>    | 0.313 |
|                | knownGene.uc003xjt.1.1.inc            | <i>UNC5D</i>   | 0.312 |
|                | refGene.NM_032680.1.inc               | <i>CRACR2A</i> | 0.306 |
|                | ensGene.ENST00000344135.1.inc         | <i>TRIO</i>    | 0.298 |

| <i>type C</i> | Gene                          |                | PBS   |
|---------------|-------------------------------|----------------|-------|
|               | knownGene.uc002ebs.1.1.inc    | <i>ITGAM</i>   | 0.552 |
|               | ensGene.ENST00000340273.1.inc | <i>MMP13</i>   | 0.505 |
|               | ensGene.ENST00000340273.1.inc | <i>MMP13</i>   | 0.481 |
|               | ensGene.ENST00000379127.1.inc | <i>C9orf24</i> | 0.479 |
|               | refGene.NM_001163334.1.inc    | <i>SYTL5</i>   | 0.467 |
|               | refGene.NM_000606.1           | <i>C8G</i>     | 0.448 |
|               | refGene.NM_152421.1.inc       | <i>FAM69B</i>  | 0.432 |
|               | refGene.NM_206810.2.inc       | <i>MOG</i>     | 0.429 |
|               | knownGene.uc002pdl.2.1        | <i>RSPH6A</i>  | 0.420 |
|               | knownGene.uc010wzl.1.1.inc    | <i>PTPRM</i>   | 0.394 |



| <b>Antarctic</b>              | <b>Gene</b>            | <b>PBS</b> |
|-------------------------------|------------------------|------------|
| knownGene.uc004cgy.2.1        | <i>FBXW5</i>           | 2.173      |
| refGene.NM_001167670.1.inc    | <i>TMEM239</i>         | 2.166      |
| refGene.NM_021059.2           | <i>HIST2H3C</i>        | 2.164      |
| knownGene.uc010zrp.1.1        | <i>RRBP1</i>           | 2.152      |
| knownGene.uc003zbq.2.1        | <i>HEATR7A / Mroh1</i> | 2.126      |
| refGene.NM_001528.1.inc       | <i>HGFAC</i>           | 2.112      |
| knownGene.uc010zrp.1.1        | <i>RRBP1</i>           | 2.092      |
| refGene.NM_030801.2           | <i>MAGED4</i>          | 2.077      |
| ensGene.ENST00000319338.1     | <i>IGSF22</i>          | 2.063      |
| ensGene.ENST00000319338.1     | <i>IGSF22</i>          | 2.055      |
| refGene.NM_019046.1.inc       | <i>ANKRD16</i>         | 2.038      |
| ensGene.ENST00000325577.1.inc | <i>RAD1</i>            | 2.034      |
| knownGene.uc001bbg.2.1        | <i>EMC1</i>            | 2.033      |
| knownGene.uc009xbu.1.1        | <i>IL20</i>            | 2.025      |
| refGene.NM_004257.1           | <i>TGFBRAP1</i>        | 2.024      |
| refGene.NM_145691.1.inc       | <i>ATPAF2</i>          | 2.020      |
| knownGene.uc002eqs.2.1        | <i>CES2</i>            | 2.016      |
| ensGene.ENST00000454048.1.inc | <i>D2HGDH</i>          | 1.999      |
| refGene.NM_015658.1.inc       | <i>NOC2L</i>           | 1.997      |
| knownGene.uc009xcp.1.1.inc    | <i>LAMB3</i>           | 1.994      |
| knownGene.uc002clz.2.1        | <i>IFT140</i>          | 1.987      |
| refGene.NM_175614.1           | <i>NDUFA11</i>         | 1.985      |
| refGene.NM_001008708.1.inc    | <i>CHAC2</i>           | 1.965      |
| refGene.NM_001388.1           | <i>DRG2</i>            | 1.962      |
| knownGene.uc002wji.1.1        | <i>C20orf27</i>        | 1.961      |
| knownGene.uc001qxr.2.1.inc    | <i>TMEM52B</i>         | 1.959      |
| refGene.NM_015164.1           | <i>PLEKHM2</i>         | 1.955      |
| refGene.NM_020982.1           | <i>CLDN9</i>           | 1.951      |
| refGene.NM_152468.1.inc       | <i>TMC8</i>            | 1.939      |
| refGene.NM_015164.1           | <i>PLEKHM2</i>         | 1.938      |
| refGene.NM_031433.1.inc       | <i>MFRP</i>            | 1.918      |
| refGene.NM_032325.1           | <i>EIF1AD</i>          | 1.917      |
| refGene.NM_173506.1           | <i>LYPD4</i>           | 1.912      |
| refGene.NM_001172431.1        | <i>AMPD3</i>           | 1.904      |
| knownGene.uc002eqs.2.1        | <i>CES2</i>            | 1.903      |
| ensGene.ENST00000401649.1.inc | <i>NOTCH2</i>          | 1.899      |
| knownGene.uc009vsu.1.1.inc    | <i>SYTL1</i>           | 1.896      |
| refGene.NM_007096.1           | <i>CLTA</i>            | 1.881      |
| knownGene.uc002viw.2.1.inc    | <i>USP37</i>           | 1.880      |
| knownGene.uc002eqs.2.1        | <i>CES2</i>            | 1.878      |
| knownGene.uc003zcn.2.1        | <i>SLC39A4</i>         | 1.875      |
| knownGene.uc002wlv.2.1        | <i>CDS2</i>            | 1.875      |
| knownGene.uc010vgi.1.1.inc    | <i>PHKB</i>            | 1.873      |
| refGene.NM_014012.1           | <i>REMI</i>            | 1.868      |
| knownGene.uc011lky.1.1.inc    | <i>WDR97</i>           | 1.867      |

|                                   |                 |       |
|-----------------------------------|-----------------|-------|
| knownGene.uc010rpw.1.1            | <i>NDUFV1</i>   | 1.860 |
| knownGene.uc010nip.2.1.inc        | <i>CACNA1F</i>  | 1.858 |
| refGene.NM_207348.1               | <i>SLC25A34</i> | 1.856 |
| refGene.NM_018163.1.inc           | <i>DNAJC17</i>  | 1.844 |
| refGene.NM_015417.1               | <i>SPEF1</i>    | 1.841 |
| refGene.NM_198317.1.inc           | <i>KLHL17</i>   | 1.835 |
| refGene.NM_004661.1               | <i>CDC23</i>    | 1.833 |
| knownGene.uc002clz.2.1            | <i>IFT140</i>   | 1.832 |
| knownGene.uc010vjn.1.1.inc        | <i>ZN423</i>    | 1.831 |
| refGene.NM_005830.1               | <i>MRPS31</i>   | 1.829 |
| refGene.NM_020650.1               | <i>RCN3</i>     | 1.829 |
| refGene.NM_018028.1.inc           | <i>SAMD4B</i>   | 1.828 |
| refGene.NM_014757.1.inc           | <i>RG214790</i> | 1.827 |
| vegaGene.OTTHUMT00000373208.1.inc | <i>GRK6</i>     | 1.826 |
| knownGene.uc001ebu.1.1            | <i>KCND3</i>    | 1.823 |
| knownGene.uc002enz.1.1.inc        | <i>CNOT1</i>    | 1.820 |
| knownGene.uc002gmc.3.1.inc        | <i>USP43</i>    | 1.816 |
| refGene.NM_001980.1               | <i>STX2</i>     | 1.814 |
| knownGene.uc002esp.3.1.inc        | <i>PLEKHG4</i>  | 1.813 |
| refGene.NM_198488.1               | <i>FAM83H</i>   | 1.809 |
| refGene.NM_001810.1.inc           | <i>CENPB</i>    | 1.807 |
| refGene.NM_172229.1.inc           | <i>KREMEN2</i>  | 1.805 |
| knownGene.uc002ixr.1.1.inc        | <i>CLTC</i>     | 1.803 |
| knownGene.uc010vyx.1.1.inc        | <i>RNF112</i>   | 1.802 |
| knownGene.uc002esp.3.1.inc        | <i>PLEKHG4</i>  | 1.797 |
| refGene.NM_014731.1               | <i>LZTS3</i>    | 1.797 |
| knownGene.uc001gwc.2.1.inc        | <i>IGFN1</i>    | 1.792 |
| refGene.NM_030759.1.inc           | <i>NRBF2</i>    | 1.790 |
| refGene.NM_014717.1               | <i>ZNF536</i>   | 1.789 |
| refGene.NM_001160184.1            | <i>PLEKHN1</i>  | 1.789 |
| refGene.NM_005165.1               | <i>ALDOC</i>    | 1.787 |
| ensGene.ENST00000263046.1         | <i>TFAP2B</i>   | 1.784 |
| refGene.NM_001100915.1            | <i>KCTD19</i>   | 1.784 |
| ensGene.ENST00000448774.1.inc     | <i>PLXNB1</i>   | 1.783 |
| knownGene.uc002esy.2.1.inc        | <i>TMEM208</i>  | 1.783 |
| refGene.NM_015164.1               | <i>PLEKHM2</i>  | 1.781 |
| knownGene.uc003etm.2.1            | <i>CLSTN2</i>   | 1.778 |
| knownGene.uc010fdo.2.1            | <i>PCYOX1</i>   | 1.777 |
| knownGene.uc001bfv.1.1.inc        | <i>ZBTB40</i>   | 1.775 |
| refGene.NM_004214.1               | <i>FIBP</i>     | 1.772 |
| refGene.NM_015457.1               | <i>ZDHHC5</i>   | 1.771 |
| ensGene.ENST00000319338.1         | <i>IGSF22</i>   | 1.767 |
| refGene.NM_021044.1               | <i>DHH</i>      | 1.765 |
| refGene.NM_198317.1.inc           | <i>KLHL17</i>   | 1.759 |
| refGene.NM_001008910.1            | <i>STK16</i>    | 1.749 |
| ensGene.ENST00000438091.1.inc     | <i>IL17RC</i>   | 1.748 |

|                               |                        |       |
|-------------------------------|------------------------|-------|
| refGene.NM_024784.1.inc       | <i>ZBTB3</i>           | 1.747 |
| refGene.NM_003407.1           | <i>ZFP36</i>           | 1.746 |
| refGene.NM_015168.1           | <i>ZC3H4</i>           | 1.744 |
| knownGene.uc002eqs.2.1        | <i>CES2</i>            | 1.739 |
| knownGene.uc002eqs.2.1        | <i>CES2</i>            | 1.739 |
| ensGene.ENST00000420190.1.inc | <i>SAMD11</i>          | 1.729 |
| knownGene.uc009wqr.1.1.inc    | <i>ASH1L</i>           | 1.726 |
| refGene.NM_014831.1.inc       | <i>TRANK1</i>          | 1.724 |
| ensGene.ENST00000448221.1.inc | <i>NFKBIL2 / TONSL</i> | 1.723 |
| knownGene.uc003mez.2.1.inc    | <i>HK3</i>             | 1.722 |
| refGene.NM_001164766.1.inc    | <i>ZFHX3</i>           | 1.719 |
| refGene.NM_001114184.1.inc    | <i>MTRF1L</i>          | 1.716 |

---

| <i>transient</i> | Gene                              | PBS                    |
|------------------|-----------------------------------|------------------------|
|                  | vegaGene.OTTHUMT00000365743.1.inc | 1.521                  |
|                  | refGene.NM_018181.1.inc           | <i>ZNF532</i> 1.164    |
|                  | knownGene.uc010qoh.1.1            | <i>ALDH18A1</i> 1.114  |
|                  | refGene.NM_002049.1.inc           | <i>GATA1</i> 1.114     |
|                  | refGene.NM_014587.1               | <i>SOX8</i> 1.112      |
|                  | ensGene.ENST00000453997.1.inc     | <i>MB</i> 1.031        |
|                  | refGene.NM_004312.1.inc           | <i>ARR3</i> 1.006      |
|                  | knownGene.uc011mmb.1.1.inc        | <i>TBC1D25</i> 1.006   |
|                  | refGene.NM_000185.1.inc           | <i>SERPIND1</i> 0.996  |
|                  | ensGene.ENST00000395426.1.inc     | <i>SLC38A4</i> 0.986   |
|                  | knownGene.uc004czb.2.1.inc        | <i>ADGRG2</i> 0.963    |
|                  | refGene.NM_005448.1               | <i>BMP15</i> 0.961     |
|                  | refGene.NM_014058.2.inc           | <i>TMPRSS11E</i> 0.920 |
|                  | refGene.NM_014008.1.inc           | <i>CCDC22</i> 0.896    |
|                  | refGene.NM_015685.1               | <i>SDCBP2</i> 0.852    |
|                  | refGene.NM_000532.1.inc           | <i>PCCB</i> 0.849      |
|                  | refGene.NM_000713.1               | <i>BLVRB</i> 0.844     |
|                  | ensGene.ENST00000437780.1         | <i>PASK</i> 0.826      |
|                  | refGene.NM_001164436.1.inc        | <i>TMEM212</i> 0.822   |
|                  | refGene.NM_002507.1.inc           | <i>NGFR</i> 0.820      |
|                  | refGene.NM_024966.1               | <i>SEMA6D</i> 0.807    |
|                  | knownGene.uc001ncf.2.1.inc        | <i>SPI1</i> 0.802      |
|                  | ensGene.ENST00000401672.1.inc     | <i>PPP6R2</i> 0.795    |
|                  | refGene.NM_006612.1               | <i>KIF1C</i> 0.779     |
|                  | ensGene.ENST00000398168.1.inc     | <i>CBS</i> 0.768       |
|                  | refGene.NM_018182.1               | <i>FAM222B</i> 0.766   |
|                  | refGene.NM_022826.1.inc           | <i>MARCH7</i> 0.766    |
|                  | refGene.NM_003645.1               | <i>SLC27A2</i> 0.759   |
|                  | knownGene.uc002hsl.2.1            | <i>ERBB2</i> 0.758     |
|                  | refGene.NM_001161416.1            | <i>GPR17</i> 0.755     |
|                  | refGene.NM_022475.1               | <i>HHIP</i> 0.754      |
|                  | refGene.NM_003189.1               | <i>TAL1</i> 0.753      |
|                  | refGene.NM_031459.1.inc           | <i>SESN2</i> 0.749     |
|                  | refGene.NM_015140.1.inc           | <i>TLL12</i> 0.747     |
|                  | refGene.NM_014467.1.inc           | <i>SRPX2</i> 0.743     |
|                  | refGene.NM_145051.1               | <i>RNF183</i> 0.738    |
|                  | refGene.NM_002225.1.inc           | <i>IVD</i> 0.733       |
|                  | refGene.NM_002125.1.inc           | <i>HLA</i> 0.706       |
|                  | refGene.NM_001616.1.inc           | <i>ACVR2A</i> 0.701    |
|                  | refGene.NM_006466.1               | <i>POLR3F</i> 0.696    |
|                  | knownGene.uc010rgx.1.1            | <i>C11orf49</i> 0.693  |
|                  | refGene.NM_032370.1               | <i>ZNF414</i> 0.688    |
|                  | refGene.NM_003041.1               | <i>SLC5A2</i> 0.683    |

|                               |                 |       |
|-------------------------------|-----------------|-------|
| knownGene.uc004dyf.1.1.inc    | <i>KIF4A</i>    | 0.673 |
| knownGene.uc004ayt.2.1        | <i>ANKS6</i>    | 0.671 |
| refGene.NM_032737.1.inc       | <i>LMNB2</i>    | 0.670 |
| refGene.NM_021209.1.inc       | <i>NLRC4</i>    | 0.663 |
| refGene.NM_015140.1.inc       | <i>TLL12</i>    | 0.661 |
| refGene.NM_001172557.1.inc    | <i>GOLGA3</i>   | 0.644 |
| refGene.NM_001409.1.inc       | <i>MEGF6</i>    | 0.639 |
| ensGene.ENST00000370100.1     | <i>SRPK3</i>    | 0.638 |
| refGene.NM_018190.1.inc       | <i>BBS7</i>     | 0.638 |
| ensGene.ENST00000453275.1.inc | <i>BHLHD14</i>  | 0.637 |
| refGene.NM_001077446.1        | <i>TSEN34</i>   | 0.631 |
| refGene.NM_001004439.1        | <i>ITGA11</i>   | 0.631 |
| knownGene.uc003dek.1.1.inc    | <i>STAB1</i>    | 0.627 |
| knownGene.uc010zkq.1.1.inc    | <i>CCDC108</i>  | 0.625 |
| ensGene.ENST00000438774.1.inc | <i>TMEM151B</i> | 0.621 |
| refGene.NM_001409.1.inc       | <i>MEGF6</i>    | 0.617 |
| refGene.NM_001943.1.inc       | <i>DSG2</i>     | 0.616 |
| knownGene.uc002ilw.1.1.inc    | <i>OSBPL7</i>   | 0.609 |
| knownGene.uc010wzv.1.1        | <i>SLMO1</i>    | 0.602 |
| refGene.NM_022119.1.inc       | <i>PRSS22</i>   | 0.599 |
| refGene.NM_024109.1.inc       | <i>METTL22</i>  | 0.598 |
| knownGene.uc009zxh.2.1.inc    | <i>TMEM120B</i> | 0.594 |
| refGene.NM_014750.1           | <i>DLGAP5</i>   | 0.590 |
| knownGene.uc011mog.1.1        | <i>RIBC1</i>    | 0.589 |
| refGene.NM_001015052.1.inc    | <i>MPG</i>      | 0.587 |
| knownGene.uc002gbz.2.1        | <i>DHX33</i>    | 0.587 |
| knownGene.uc001kqm.3.1        | <i>SFTPA2</i>   | 0.574 |
| knownGene.uc002fxk.1.1.inc    | <i>ZZEF1</i>    | 0.574 |
| refGene.NM_022150.1.inc       | <i>NPVF</i>     | 0.571 |
| knownGene.uc003qwz.1.1.inc    | <i>WDR27</i>    | 0.567 |
| refGene.NM_003667.1           | <i>LGR5</i>     | 0.566 |
| refGene.NM_153836.1.inc       | <i>CREG2</i>    | 0.556 |
| knownGene.uc001poi.2.1        | <i>USP28</i>    | 0.552 |
| refGene.NM_001081003.1.inc    | <i>COMMD5</i>   | 0.548 |
| knownGene.uc010nzu.1.1.inc    | <i>DNAJC11</i>  | 0.547 |
| refGene.NM_001013.1.inc       | <i>RPS9</i>     | 0.542 |
| knownGene.uc010lyh.2.1.inc    | <i>TGS1</i>     | 0.540 |
| refGene.NM_145267.1           | <i>SDHAF4</i>   | 0.540 |
| refGene.NM_001114632.1        | <i>JMJD7</i>    | 0.536 |
| refGene.NM_005073.1.inc       | <i>SLC15A1</i>  | 0.531 |
| knownGene.uc010dsl.2.1        | <i>ADAMTS</i>   | 0.530 |
| refGene.NM_001098202.1        | <i>HIC1</i>     | 0.528 |
| refGene.NM_002081.1.inc       | <i>GPC1</i>     | 0.524 |
| refGene.NM_001130043.1        | <i>CRYZ</i>     | 0.519 |
| refGene.NM_023915.1           | <i>GPR87</i>    | 0.515 |
| refGene.NM_000376.1           | <i>VDR</i>      | 0.512 |

|                               |                 |       |
|-------------------------------|-----------------|-------|
| refGene.NM_003212.1.inc       | <i>TDGFI</i>    | 0.511 |
| knownGene.uc002mje.2.1        | <i>FBN3</i>     | 0.511 |
| knownGene.uc010ptv.1.1        | <i>RPS6KCI</i>  | 0.509 |
| knownGene.uc003jow.2.1        | <i>ITGAI</i>    | 0.508 |
| refGene.NM_152419.1.inc       | <i>HGSNAT</i>   | 0.507 |
| knownGene.uc003gfa.1.1.inc    | <i>BC010180</i> | 0.506 |
| refGene.NM_018964.1           | <i>SLC37A1</i>  | 0.504 |
| knownGene.uc011ljc.1.1.inc    | <i>TG</i>       | 0.504 |
| refGene.NM_002862.1.inc       | <i>PYGB</i>     | 0.504 |
| knownGene.uc004amu.1.1.inc    | <i>GKAP1</i>    | 0.503 |
| ensGene.ENST00000254271.1.inc | <i>LRRC9</i>    | 0.502 |
| ensGene.ENST00000436299.1.inc | <i>EPHB6</i>    | 0.500 |
| knownGene.uc003zoh.1.1        | <i>FOCAD</i>    | 0.500 |
| refGene.NM_001029863.1.inc    | <i>C6orf120</i> | 0.496 |

---

| <i>resident</i>               | <b>Gene</b>     | <b>PBS</b> |
|-------------------------------|-----------------|------------|
| ensGene.ENST00000437387.1.inc | <i>MYO7B</i>    | 2.089      |
| refGene.NM_174944.1.inc       | <i>TSSK4</i>    | 1.926      |
| ensGene.ENST00000436581.1     | <i>RUNX1T1</i>  | 1.918      |
| refGene.NM_153646.1           | <i>SLC24A4</i>  | 1.874      |
| refGene.NM_007073.1.inc       | <i>BVES</i>     | 1.868      |
| refGene.NM_006693.1.inc       | <i>CPSF4</i>    | 1.846      |
| ensGene.ENST00000437387.1.inc | <i>MYO7B</i>    | 1.741      |
| ensGene.ENST00000379274.1.inc | <i>DGKH</i>     | 1.740      |
| ensGene.ENST00000373702.1     | <i>DOCK10</i>   | 1.737      |
| refGene.NM_015335.1           | <i>MED13L</i>   | 1.730      |
| knownGene.uc003qhy.2.1.inc    | <i>IL20RA</i>   | 1.727      |
| refGene.NM_147780.1.inc       | <i>CTSB</i>     | 1.687      |
| refGene.NM_002125.1.inc       | <i>HLA-DRB5</i> | 1.679      |
| knownGene.uc010tog.1.1.inc    | <i>TGMI</i>     | 1.616      |
| refGene.NM_018838.1           | <i>NDUFA12</i>  | 1.603      |
| refGene.NM_213720.1.inc       | <i>CHCHD10</i>  | 1.559      |
| knownGene.uc003lll.2.1.inc    | <i>ARAP3</i>    | 1.542      |
| knownGene.uc010wii.1.1        | <i>ETV4</i>     | 1.514      |
| refGene.NM_181643.1.inc       | <i>PIFO</i>     | 1.493      |
| knownGene.uc010nip.2.1.inc    | <i>CACNA1F</i>  | 1.491      |
| ensGene.ENST00000433625.1.inc | <i>EFHC1</i>    | 1.475      |
| refGene.NM_018842.1.inc       | <i>BAIAP2L1</i> | 1.464      |
| ensGene.ENST00000370864.1.inc | <i>TINAG</i>    | 1.462      |
| ensGene.ENST00000379274.1.inc | <i>DGKH</i>     | 1.462      |
| knownGene.uc003qrb.2.1        | <i>SERAC1</i>   | 1.461      |
| refGene.NM_138441.1.inc       | <i>MB21D1</i>   | 1.453      |
| knownGene.uc010tjh.1.1.inc    | <i>TEP1</i>     | 1.453      |
| refGene.NM_015715.1.inc       | <i>PLA2G3</i>   | 1.452      |
| refGene.NM_001048199.1        | <i>RCC1</i>     | 1.451      |
| ensGene.ENST00000288709.1.inc | <i>MMEL1</i>    | 1.447      |
| knownGene.uc010voj.1.1        | <i>KIAA0513</i> | 1.446      |
| refGene.NM_080821.1.inc       | <i>FAM210B</i>  | 1.394      |
| refGene.NM_003459.1.inc       | <i>SLC30A3</i>  | 1.365      |
| refGene.NM_003052.1           | <i>SLC34A1</i>  | 1.363      |
| refGene.NM_001001795.1.inc    | <i>LRRC24</i>   | 1.355      |
| knownGene.uc003wub.1.1        | <i>GATA4</i>    | 1.351      |
| ensGene.ENST00000395536.1.inc | <i>AKAP10</i>   | 1.340      |
| refGene.NM_002336.1.inc       | <i>LRP6</i>     | 1.326      |
| knownGene.uc010ztr.1.1.inc    | <i>TM9SF4</i>   | 1.320      |
| refGene.NM_174905.1.inc       | <i>FAM98C</i>   | 1.314      |
| knownGene.uc002bwq.1.1.inc    | <i>LRRK1</i>    | 1.304      |
| knownGene.uc002lmk.1.1.inc    | <i>ZNF236</i>   | 1.301      |
| ensGene.ENST00000476379.1     | <i>CCDC39</i>   | 1.298      |

|                               |                 |       |
|-------------------------------|-----------------|-------|
| refGene.NM_171982.1.inc       | <i>TRIM35</i>   | 1.291 |
| knownGene.uc010udj.1.1        | <i>STARD9</i>   | 1.290 |
| refGene.NM_139179.1           | <i>DAGLB</i>    | 1.285 |
| refGene.NM_003447.1           | <i>ORIF12</i>   | 1.271 |
| refGene.NM_024658.1           | <i>IPO4</i>     | 1.255 |
| refGene.NM_002353.1           | <i>TACSTD2</i>  | 1.247 |
| refGene.NM_139179.1           | <i>DAGLB</i>    | 1.242 |
| refGene.NM_178034.1           | <i>PLA2G4D</i>  | 1.230 |
| knownGene.uc001oke.1.1        | <i>ANKRD13D</i> | 1.223 |
| refGene.NM_014976.1           | <i>PDCD11</i>   | 1.219 |
| knownGene.uc001qfl.2.1.inc    | <i>PRDM10</i>   | 1.216 |
| refGene.NM_003124.1.inc       | <i>SPR</i>      | 1.211 |
| ensGene.ENST00000254271.1.inc | <i>LRRC9</i>    | 1.207 |

---



# Supplementary Notes

## A brief natural history of the study species

The killer whale is emerging as a useful organism for studying adaptation and speciation, as the phenotype, biogeography and ecology underlying evolutionary divergence and the genetic outcome in terms of neutral genetic differentiation are well described<sup>13,78</sup>. Dietary differences have been studied through: direct observation of naturally marked, site-faithful individuals over many years; multi-chemical markers such as stable isotope and fatty acids; and molecular and visual identification of prey remains from predation events, faecal samples and stomach contents<sup>7-10,79-89</sup>. Morphology has been described qualitatively and quantitatively. For example, body length has been measured directly from stranded and captive specimens or those taken by whaling operations, or from free-ranging live specimens using laser-metrics and aerial photogrammetry<sup>10,90-94</sup>; and pigmentation features have been qualitatively and quantitatively compared among populations from photographic data<sup>9,95-98</sup>.

Four decades of dedicated research in the North Pacific have characterized three ecotypes to date: a mammal-eating specialist commonly referred to the ‘*transient*’ ecotype as (more recent studies have referred to this ecotype as Bigg’s killer whale, named after the biologist Michael Bigg, who pioneered modern killer whale research and made studies like this one possible<sup>99</sup>); a fish-eating specialist commonly referred to as the ‘*resident*’ ecotype; and a third Pacific ecotype is most frequently encountered in waters further offshore but on the continental shelf slope and is known to have a diet that includes sharks and other fish, and is commonly referred to as the so-called ‘*offshore*’ ecotype<sup>88,100</sup>. Observations of social interactions between different ecotypes are extremely rare and the observations of encounters between the *resident* and *transient* ecotypes indicate that the *transient* ecotype will typically change travel patterns to avoid the *resident* ecotype and that occasionally *residents* display antagonistic behaviour towards *transients*<sup>101-103</sup>. There are morphological differences between these three North Pacific ecotypes including overall body size and the shape of the dorsal fin and saddle patch<sup>95,104</sup>.

Long-term studies of naturally marked individuals have detected no dispersal between North Pacific ecotypes and no dispersal from the natal matrilineal social in the

*resident* ecotype<sup>99,104</sup>. There is some dispersal of *transients* from the natal group<sup>102,105</sup>. The lack of dispersal between ecotypes appears to have been maintained over longer timescales than the field studies based on lineage sorting of mitochondrial genomes and significant differentiation between ecotypes based on microsatellite allele frequencies<sup>11,106-109</sup>. Better resolution on the timing and extent of any gene flow between North Pacific ecotypes is needed. Phylogeographic analyses based on mitogenome sequences indicate that the *resident* and *offshore* ecotypes share a more recent common ancestor with lineages of Northeast Atlantic killer whales than with the *transient* ecotype and are consistent with sympatry between the North Pacific ecotypes arising from secondary contact following an allopatric phase<sup>110</sup>. However, phylogenies based on nuclear loci are to some extent discordant with the mitochondrial phylogeny<sup>22</sup>, possibly due to low levels of gene flow between ecotypes within the same ocean basin, which may have occurred upon primary or secondary contact, making it difficult to discern between these two scenarios<sup>111</sup>. There are several genetically differentiated populations of the *resident* and *transient* ecotype in the North Pacific<sup>106-108</sup>, but to date only one population of the *offshore* ecotype has been identified<sup>106,107</sup>.

Killer whales in the waters around the Antarctic continent have diversified into several distinct morphotypes partially overlapping in their ranges<sup>9,10,81,82</sup>. Killer whales in Antarctic waters with the pigmentation patterns that most closely resemble the common killer whale colouration are morphologically classified as *type A*<sup>9</sup>, but this classification does not infer genetic or ecologically cohesiveness. The Antarctic morphotypes included in this study (*types B1, B2 & C*) differ from *type A* as they have a discernable dorsal cape<sup>9,10</sup>. *Types B1* and *B2* have a large eye patch<sup>9,10</sup>, whereas *type C* has a smaller forward-slanted eye patch<sup>9</sup>. Body size also varies, with photogrammetry measurements indicating that *type B2* is smaller than *type B1*<sup>10</sup>, and that *type C* grow up to just 5.6 meters in length, making this the smallest form of killer whale measured to date<sup>94</sup>.

Field observations and stable isotope measurements indicate that there are differences in the preferred habitat and prey of each of the Antarctic types<sup>9,10,81,82,85</sup>. *Type B1* is commonly observed in the pack-ice hunting Weddell seals (*Leptonychotes weddellii*)<sup>10,82</sup>, whilst *type B2* forages in more open water, observed killing and eating

penguins<sup>10,83</sup>; *type C* is most commonly observed in the dense pack-ice and its diet is known from observations to include Antarctic toothfish (*Dissostichus mawsoni*) and based on stomach contents from Soviet whaling data is thought to be primarily piscivorous<sup>9</sup>. Most observations of these Antarctic types have been made during the Austral summer, however, there are some observations of *type B* and *type C* in the Antarctic pack-ice during the Austral winter<sup>9</sup>. There have also been occasional sightings of these Antarctic types at higher latitudes<sup>9</sup> and satellite-tagging data indicates that they make rapid round-trip movements from Antarctic waters to subtropical waters and back, hypothesized to be for skin generation in warmer waters<sup>42</sup>.

Genetic differentiation based on microsatellite allele frequencies is relatively low between *type B* and *type C* ( $G'_{ST} = 0.11$ ) compared with differentiation between the North Pacific *resident* and *transient* ecotypes ( $G'_{ST} = 0.28$ )<sup>112</sup>. Mitogenome phylogenetic analyses indicate that *type B* (both *B1* and *B2*) and *type C* are reciprocally monophyletic, suggesting that there is little or no permanent dispersal between types<sup>11,112</sup>, with the exception of a single sampled *type B1* individual<sup>11</sup>. Comparison of amino acid substitutions across the mitogenome identified two non-synonymous changes resulting in localized changes in polarity that putatively occurred under natural selection within the *cytochrome b* gene<sup>113</sup>. One change had reached fixation in *type B* killer whales (both *B1* and *B2*) and the other was close to fixation in *type C*<sup>113</sup>. The changes were at different sites and in the opposite direction in each type, suggesting divergent evolution since *types B1, B2* and *C* diverged from their most recent common ancestor. All other substitutions across the mitogenome in a global killer whale dataset appeared to have evolved under neutrality<sup>113</sup>.

The published data cited here indicate that these populations of killer whales are ecologically, morphologically and genetically divergent, and thus generally meet the criteria for most of the many definitions of the term ‘ecotype’ that have been proposed over the years<sup>114</sup>. The term ecotype is therefore adopted here. The behavioural adaptations that each ecotype uses to exploit an ecological niche are thought to be passed on from one generation to the next by social learning within matrilineal groups<sup>12,13</sup>. These behavioural adaptations include: coordinated ‘wave-washing’ behaviour by *type B1* killer whales in Antarctica to dislodge seals from ice

floes<sup>82</sup>; ‘carousel-feeding’, whereby killer whales in some North Atlantic populations are reported to co-ordinately herd herring schools into a tight ball by encircling them, flashing their white undersides, emitting large bubbles and producing a low frequency pulsed call, prior to tail-slapping the herded herring to stun them<sup>115,116</sup>; and intentional stranding on to the beach to catch seals performed by some killer whale social groups at the Crozet Archipelago in the Southern Ocean<sup>117,118</sup>. Perhaps due to the complexity and cumulative nature of human culture and due to it being the focus of study in a range of fields from anthropology to zoology, there is no clear definitional consensus of the term ‘culture’<sup>1</sup>. For the purposes of investigating how cultural phenomena interact with genes, a recent review suggested that “culture is information that is capable of affecting individuals’ behaviour, which they acquire from other individuals through teaching, imitation and other forms of social learning”<sup>1</sup>. Under this definition, several studies have argued that socially learned foraging behaviours within killer whale ecotypes should be considered as examples of culture in this broader sense of the term<sup>13,14,119</sup>.

## Supplementary References

70. Grabherr, M. G. *et al.* Genome-wide synteny through highly sensitive sequence alignment: Satsuma. *Bioinformatics* **26**, 1145–1151 (2010).
71. Foote A. D. *et al.* Tracking niche variation over millennial timescales in sympatric killer whale lineages *Proc. R. Soc. B* **280**, 20131481 (2013).
72. Vieira, F. G., Lassalle, F., Korneliussen, T. S. & Fumagalli, M. Improving the estimation of genetic distances from Next-Generation Sequencing data. *Biol. J. Linnean Soc.* **117**, 139-149 (2015).
73. Lefort, V., Desper, R. & Gascuel, O. FastME 2.0: a comprehensive, accurate, and fast distance-based phylogeny inference program. *Mol. Biol. Evol.* **32**, 2798-2800 (2015).
74. Korneliussen, T. S. & Moltke, I. NgsRelate: a software tool for estimating pairwise relatedness from next-generation sequencing data. *Bioinformatics* **31**, 4009-4011.
75. Durand, E. Y., Patterson, N., Reich, D. & Slatkin, M. Testing for ancient admixture between closely related populations. *Mol. Biol. Evol.* **28**, 2239–2252 (2011).
76. Orlando, L. *et al.* Recalibrating *Equus* evolution using the genome sequence of an early Middle Pleistocene horse. *Nature* **499**, 74–78 (2013).
77. Staab, P. R., Zhu, S., Metzler, D. & Lunter, G. scrm: efficiently simulating long sequences using the approximated coalescent with recombination. *Bioinformatics* **31**, 1680–1682 (2015).
78. Foote A. D. Investigating ecological speciation in non-model organisms: a case study on killer whale ecotypes. *Evol. Ecol. Res.* **14**, 447–465 (2012).
79. Matkin C. O. *et al.* Ecotypic variation and predatory behavior among killer whales (*Orcinus orca*) off the eastern Aleutian Islands, Alaska. *Fish. Bull.* **105**, 74–87 (2007).
80. Filatova O. A. *et al.* Reproductively isolated ecotypes of killer whales *Orcinus orca* in the seas of the Russian Far East. *Biology Bulletin* **42**, 674–681 (2015).
81. Pitman R. L. & Durban, J. W. Killer whale predation on penguins in Antarctica. *Polar Biol.* **33**, 1589–1594 (2010).
82. Pitman R. L. & Durban, J. W. Cooperative hunting behavior, prey selectivity and prey handling by pack ice killer whales (*Orcinus orca*), type B, in Antarctic Peninsula waters. *Mar. Mamm. Sci.* **28**, 16–36 (2012).
83. Foote A. D. *et al.* Ecological, morphological and genetic divergence of sympatric North Atlantic killer whale populations. *Mol. Ecol.* **18**, 5207–5217 (2009).
84. Herman D. P. *et al.* Feeding ecology of eastern North Pacific killer whales *Orcinus orca* from fatty acid, stable isotope, and organochlorine analyses of blubber biopsies. *Mar. Ecol. Prog. Ser.* **302**, 275–291(2005).
85. Krahn M. M. *et al.* Use of chemical tracers in assessing the diet and foraging regions of eastern North Pacific killer whales. *Mar. Environ. Res.* **63**, 91–114 (2007).
86. Rice, D. W. Stomach contents and feeding behaviour of killer whales in the eastern North Pacific. *Norsk Hval-fangst Tidsskr* **57**, 35–38 (1968).
87. Matthews, C. J. D. & Ferguson, S. H. Spatial segregation and similar trophic level diet among eastern Canadian Arctic/ north-west Atlantic killer whales inferred from bulk and compound specific isotopic analysis. *J. Mar. Biol. Assoc. UK.* **94**, 1343–1355 (2014).
88. Ford J. K. B. *et al.* Shark predation and tooth wear in a population of

- northeastern Pacific killer whales. *Aquat. Biol.* **11**, 213–224 (2011).
89. Krahn M. M. *et al.* Use of chemical tracers to assess diet and persistent organic pollutants in Antarctic Type C killer whales. *Mar. Mamm. Sci.* **24**, 643–663 (2008).
  90. Christensen, I. Growth and reproduction of killer whales, *Orcinus orca*, in Norwegian coastal waters. *Rep. Int. Whaling Comm.* Special Issue **6**, 253–258 (1984).
  91. Duffield, D. A. & Miller, K. W. Demographic features of killer whales in oceanaria in the United States and Canada, 1965–1987. *Rit Fisk.* **11**, 297–306 (1988).
  92. Durban, J. W. & Parsons, K. M. Laser-metrics of free-ranging killer whales. *Mar. Mamm. Sci.* **22**, 735–743 (2006).
  93. Pitman R. L. *et al.* A dwarf form of killer whale in Antarctica. *J. Mammal.* **88**, 43–48 (2007).
  94. Fearnbach H. *et al.* Size and long-term growth trends of Endangered fish-eating killer whales. *Endang. Species Res.* **13**, 173–180 (2011).
  95. Baird, R. W. & Stacey, P. J. Variation in saddle patch pigmentation in populations of killer whales (*Orcinus orca*) from British Columbia, Alaska, and Washington State. *Can. J. Zool.* **66**, 2582–2585 (1988).
  96. Visser, I. N. & Mäkeläinen, P. Variation in eye-patch shape of killer whales (*Orcinus orca*) in New Zealand waters. *Mar. Mamm. Sci.* **16**, 459–469 (2000).
  97. Pitman R. L. *et al.* Observations of a distinctive morphotype of killer whale (*Orcinus orca*), type D, from subantarctic waters. *Polar Biol.* **34**, 303–306 (2011).
  98. Mäkeläinen P. *et al.* A comparison of pigmentation features among North Atlantic killer whale (*Orcinus orca*) populations. *J. Mar. Biol. Assoc. UK.* **94**, 1335–1341 (2014).
  99. Bigg, M. A., Olesiuk, P. F., Ellis, G. M., Ford, J. K. B. & Balcomb, K. C. Social organization and genealogy of resident killer whales (*Orcinus orca*) in the coastal waters of British Columbia and Washington State. *Rep. Int. Whal. Comm. (special issue)* **12**, 383–405 (1990).
  100. Dahlheim, M. E., Schulman-Janiger, A., Black, N., Ternullo, R. Ellifrit, D. & Balcomb III, K. C. Eastern temperate North Pacific offshore killer whales (*Orcinus orca*): occurrence, movements, and insights into feeding ecology. *Mar. Mamm. Sci.* **24**, 719–729 (2008).
  101. Morton, A. B. A quantitative comparison of the behaviour of resident and transient forms of killer whales off the central British Columbia coast. *Rep. Int. Whaling Commn.* **12**, 245–248 (1990).
  102. Ford, J. K. B. & Ellis, G. M. *Transients: mammal-hunting killer whales of British Columbia, Washington, and southeastern Alaska.* (UBC Press, 1999).
  103. Baird, R. W. & Dill, L. M. Occurrence and behavior of transient killer whales: seasonal and pod-specific variability, foraging behavior and prey handling. *Can. J. Zool.* **73**, 1300–1311 (1995).
  104. Ford, J. K. B. Ellis, G. M. & Balcomb, K. C. *Killer whales: the natural history and genealogy of *Orcinus orca* in British Columbia and Washington.* (UBC Press, 2000).
  105. Baird, R. W. & Whitehead, H. Social organization of mammal-eating killer whales: group stability and dispersal patterns. *Can. J. Zool.* **78**, 2096–2105 (2000).
  106. Barrett-Lennard, L. G. Population structure and mating patterns of killer whales (*Orcinus orca*) as revealed by DNA analysis. PhD thesis (2000).

107. Hoelzel, A. R. Evolution of population structure in a highly social top predator, the killer whale. *Mol. Biol. Evol.* **76**, 1407-1415 (2007).
108. Parsons, K. M. *et al.* Geographic patterns of genetic differentiation among killer whales in the northern North Pacific. *J. Hered.* **104**, 737–754 (2013).
109. Ford M. J. *et al.* Inferred paternity and male reproductive success in a killer whale (*Orcinus orca*) population. *J. Hered.* **102**, 537–553 (2011).
110. Foote A. D. *et al.* Out of the Pacific and back again: the matrilineal history of Pacific killer whale ecotypes. *PLoS ONE* **6**, e24980 (2011).
111. Foote, A. D. & Morin, P. A. Sympatric speciation in killer whales? *Heredity* **114**, 537–538 (2015).
112. Morin, P. A. *et al.* Complete mitochondrial genome phylogeographic analysis of killer whales (*Orcinus orca*) indicates multiple species. *Genome Res.* **20**, 908–916 (2010).
113. Foote *et al.* A. D. Positive selection on the killer whale mitogenome. *Biol. Lett.* **7**, 116–118 (2011).
114. Lowry, D. B. Ecotypes and the controversy over stages in the formation of new species. *Biol. J. Linn. Soc.* **106**, 241–257 (2012).
115. Similä, T. & Ugarte, F. Surface and underwater observations of cooperatively feeding killer whales in northern Norway. *Can. J. Zool.* **71**, 1494-1499 (1993).
116. Simon M. *et al.* Icelandic killer whales *Orcinus orca* use a pulsed call suitable for manipulating the schooling behaviour of herring *Clupea harengus*. *Bioacoustics* **16**, 57–74 (2006).
117. Guinet, C. Intentional stranding apprenticeship and social play in killer whales (*Orcinus orca*). *Can. J. Zool.* **69**, 2712–2716 (1991).
118. Guinet, C. & Bouvier, J. Development of intentional stranding hunting techniques in killer whale (*Orcinus orca*) calves at Crozet Archipelago. *Can. J. Zool.* **73**, 27–33 (1995).
119. Whitehead, H. Cultural selection and genetic diversity in matrilineal whales. *Science* **282**, 1708–1711 (1998).
